# 1 Interdependent Iron and Phosphorus Availability Controls Photosynthesis 2 Through Retrograde Signaling

3  
4 Hye-In Nam<sup>1</sup>, Zaigham Shahzad<sup>2</sup>, Yanniv Dorone<sup>1,4</sup>, Sophie Clowez<sup>1</sup>, Kangmei  
5 Zhao<sup>1</sup>, Nadia Bouain<sup>3</sup>, Huikyong Cho<sup>3</sup>, Seung Y. Rhee<sup>1\*</sup>, Hatem Rouached<sup>3,5,6\*</sup>

## 6 7 Affiliations:

8 <sup>1</sup>Department of Plant Biology, Carnegie Institution for Science, Stanford, California,  
9 USA

10 <sup>2</sup>Department of Cell and Developmental Biology, John Innes Centre, Norwich NR4  
11 7UH, UK

12 <sup>3</sup>BPMP, Univ Montpellier, CNRS, INRAE, Montpellier SupAgro, Montpellier, France

13 <sup>4</sup>Department of Biology, Stanford University, Stanford, CA 94305, USA

14 <sup>5</sup>Plant Resilience Institute, Michigan State University, East Lansing, MI 48824, USA

15 <sup>6</sup>Department of Plant, Soil, and Microbial Sciences, Michigan State University, East  
16 Lansing, MI 48824, USA

17  
18 \*For correspondence: [rouached@msu.edu](mailto:rouached@msu.edu); [srhee@carnegiescience.edu](mailto:srhee@carnegiescience.edu)

19  
20 **Iron deficiency hampers photosynthesis and is associated with chlorosis. We**  
21 **recently showed that iron deficiency-induced chlorosis depends on**  
22 **phosphorus availability. How plants integrate these cues to control chlorophyll**  
23 **accumulation is unknown. Here, we show that iron limitation downregulates**  
24 **photosynthesis genes in a phosphorus-dependent manner. Using**  
25 **transcriptomics and genome-wide association analysis, we identify two genes,**  
26 **a chloroplastic ascorbate transporter (*PHT4;4*) and a nuclear transcription**  
27 **factor (*bZIP58*), which prevent the downregulation of photosynthesis genes**  
28 **leading to the stay-green phenotype under iron-phosphorus deficiency. Joint**  
29 **limitation of these nutrients induces ascorbate accumulation by activating**  
30 **expression of an ascorbate biosynthesis gene, *VTC4*, which requires *bZIP58*.**  
31 **Exogenous ascorbate prevents iron deficiency-induced chlorosis in *vtc4***  
32 **mutants, but not in *bzip58* or *pht4;4*. Our study demonstrates chloroplastic**  
33 **ascorbate transport is essential for preventing the downregulation of**  
34 **photosynthesis genes under iron-phosphorus combined deficiency. These**  
35 **findings uncover a molecular pathway coordinating chloroplast-nucleus**  
36 **communication to adapt photosynthesis to nutrient availability.**  
37

38 Chloroplasts are sites of photosynthesis, whose function requires numerous proteins  
39 encoded in the nuclear genome<sup>1</sup>. Although plants tightly orchestrate chloroplast-to-  
40 nucleus signaling (retrograde control), it is poorly understood at the mechanistic  
41 level. Additionally, the adequate accumulation of nutrients such as iron (Fe) in  
42 chloroplasts is required for their optimal performance<sup>2,3</sup>. Up to 80% of Fe in leaves is  
43 located in the chloroplasts<sup>4,5</sup>, where its ability to donate and accept electrons plays a  
44 central role in electron transfer reactions<sup>6</sup>. Fe is found in all electron transfer  
45 complexes PSI, PSII, cytochrome b6f complex, and ferredoxins and is required for  
46 the biogenesis of cofactors such as hemes and iron-sulfur clusters<sup>7,8</sup>. Plants grown  
47 under Fe-deficient (-Fe) environments show chlorotic symptoms<sup>9</sup>, and compromised  
48 photosynthesis<sup>2,3</sup>. However, chlorotic leaves can also develop under high-  
49 phosphorus (P) conditions, despite replete Fe levels<sup>10</sup>, challenging the causal  
50 connection between Fe concentration and chlorophyll accumulation. Moreover, we  
51 recently reported that rice plants grown under a combined Fe and P deficiency (-Fe-  
52 P) do not exhibit a chlorotic phenotype<sup>11</sup>. These observations revealed a gap in our  
53 understanding of the interdependent effects of nutrient availability on regulating  
54 photosynthesis. Here, we addressed this issue through a combination of global gene  
55 expression analyses and genome-wide association studies (GWAS) to find  
56 expression quantitative trait loci (eQTLs) and uncovered a regulatory module that  
57 controls chlorophyll accumulation in response to Fe and P availability. This module  
58 involves an ascorbic acid (AsA) synthesis enzyme named VITAMINC4 (VTC4), a  
59 chloroplastic AsA transporter named PHOSPHATE TRANSPORTER 4;4 (PHT4;4),  
60 and a putative transcription factor named BASIC LEUCINE-ZIPPER 58 (bZIP58).  
61 The functioning of this module sheds light on the importance of chloroplast-nucleus  
62 communications under co-occurring nutrient deficiencies in controlling  
63 photosynthesis.

64

65 We previously reported that Fe deficiency-induced chlorosis depends on P  
66 availability in rice<sup>11</sup>. To investigate whether the interdependent effects of Fe and P  
67 availability on chlorosis are conserved across monocot and eudicot species, we  
68 phenotyped *Arabidopsis thaliana* Col-0 (eudicot) and *Lemna gibba* (monocot), along  
69 with *Oryza sativa* (monocot), under different regimes of Fe and P availability. Fe  
70 deficiency (-Fe) caused chlorosis in all three species, but only in the presence of P (-  
71 Fe+P) (Figure 1A-C). Quantification of chlorophyll content confirmed that -Fe

72 significantly reduced the accumulation of chlorophyll in all three species (Figure 1D).  
73 However, under -Fe-P conditions, chlorophyll content was comparable to control  
74 (+Fe+P) conditions in these species (Figure 1D). Next, we focused on Arabidopsis to  
75 gain insights into the physiological and molecular processes underlying the recovery  
76 of chlorosis under -Fe-P conditions. First, we asked whether absence of chlorosis  
77 under -Fe-P is caused by an increase of Fe levels in shoots. Plants grown in -Fe+P  
78 conditions decreased total Fe in shoots by 2-fold compared to +Fe+P conditions  
79 (Figure 1E). On the other hand, under +Fe-P conditions, Fe levels increased by 2.2-  
80 fold relative to +Fe+P conditions (Figure 1E). Surprisingly, Fe levels in plants grown  
81 under -Fe-P were reduced and indistinguishable from the Fe levels in -Fe+P  
82 conditions (Figure 1E). Therefore, the lack of chlorosis under -Fe-P is unlikely to be  
83 caused by more Fe available in shoots. To further test this hypothesis, we assessed  
84 free Fe in leaves. Because FERRITIN1 (*AtFER1*) chelates Fe and its mRNA  
85 increases when Fe is in excess, *AtFER1* gene expression can be used as a read-out  
86 for intracellular Fe nutritional status<sup>12</sup>. We thus quantified the expression of *AtFER1*  
87 in shoots under replete or deficient Fe and P in the growth media. Consistent with the  
88 total Fe levels, *AtFER1* expression was increased significantly under +Fe-P  
89 conditions relative to +Fe+P (Figure 1F). However, *AtFER1* expression decreased  
90 under both -Fe+P and -Fe-P conditions relative to +Fe+P (Figure 1F). Interestingly,  
91 -Fe-P condition caused a slightly bigger reduction in *AtFER1* expression than -Fe+P  
92 did, suggesting that there may be even less free Fe in -Fe-P conditions than in -Fe+P  
93 conditions. Taken together, these data show that the onset of chlorosis during -Fe  
94 requires sufficient P in the growth media, and that the “stay green” phenotype under  
95 the combined -Fe-P deficiency cannot be linked to Fe nutritional status in leaves.

96  
97 To understand the cause of chlorophyll reduction in response to -Fe, we first  
98 explored the timing of -Fe sensing and photosynthetic function response. Since -Fe  
99 affects chlorophyll accumulation and photosystem II (PSII) activity<sup>13,14</sup>, we monitored  
100 their kinetics over 172 hours (h) (Figure 2A-B, Figure S1A-C). Arabidopsis plants  
101 were first grown on +Fe+P media for one week, and then transferred to +Fe+P, -  
102 Fe+P, or -Fe-P conditions. -Fe+P caused a significant decrease in chlorophyll  
103 content observable starting at 52 h after the transfer to -Fe+P (Figure 2A). However,  
104 transfer to -Fe-P did not affect chlorophyll content, even at 172 h after the transfer  
105 (Figure 2A). To determine how photosynthesis was affected, we measured Fv/Fm,

106 which reflects the quantum yield of photochemistry and is a measure of PSII  
107 activity<sup>13,14</sup>. Plants under -Fe+P decreased Fv/Fm observable starting at 52h,  
108 indicative of compromised electron transport through PSII, and which coincides with  
109 the decrease of chlorophyll accumulation (Figure 2B). By 172 h, PSII activity was  
110 substantially reduced under -Fe+P compared to +Fe+P. However, plants under -Fe-P  
111 showed slightly lower but stabilized Fv/Fm compared to those in +Fe+P (Figure 2B).  
112 These physiological characterizations showed that chlorophyll accumulation and PSII  
113 activity were affected by -Fe, and both responses were P-dependent (Figure 2A-B).

114  
115 Based on these findings, we selected three time points at 39, 52, and 76 h after the  
116 transfer of plants to +Fe+P, -Fe+P, or -Fe-P to conduct a global gene expression  
117 analysis in shoots (Figure 2C, Figure S2A-F). We identified genes whose expression  
118 levels were either increased or decreased by -Fe+P relative to +Fe+P by at least 2-  
119 fold at a p-value < 0.05 (Figures 2D, Table S1). Even more genes were either  
120 upregulated or downregulated in -Fe-P conditions relative to +Fe+P (Figures 2D,  
121 Figure S3A-C). A total of 671 and 2434 transcripts were uniquely differentially  
122 regulated in response to -Fe+P or -Fe-P, respectively, supporting the existence of  
123 different signaling pathways under the two conditions (Figure S 3A-C). To identify  
124 functions enriched in genes that were differently regulated by -Fe+P or -Fe-P, we  
125 performed Gene Ontology (GO) enrichment analysis. Genes specifically  
126 downregulated by -Fe-P but not by -Fe+P at 52 h and 76 h (52 genes; Figure S4A,  
127 Table S1) showed an enrichment for ribosomal genes (Figure S4B) while  
128 upregulated genes (162 genes, Figure S4C, Table S1) revealed an enrichment for  
129 genes involved in cation transport, response to water, and ester hydrolysis (Figure  
130 S4D, Table S1). On the other hand, GO analysis of the 32 genes specifically  
131 downregulated by -Fe+P but not affected by -Fe-P at 52 h and 76 h (Figure 2E, Table  
132 S1) revealed an enrichment of genes related to the chloroplast and photosynthesis-  
133 related processes (Figure 2F), while upregulated genes (Figure S4E) were enriched  
134 for genes related to cellular respiration, oxidation-reduction process, and energy  
135 metabolism (35 genes; Figure S4F). Altogether, the transcriptomics analysis  
136 indicated that the control of chloroplast function is an integral component of the  
137 nuclear transcriptomic response to -Fe, which is dependent on P availability. We also  
138 learned that the photosynthesis-related phenotypes we observed under -Fe+P, but  
139 not under -Fe-P, could be due to downregulation of key photosynthesis regulators.

140 To decode the signaling pathways that control expression of the photosynthesis  
141 genes in response to -Fe+P, we exploited natural variation in expression of the 32  
142 genes that were down-regulated by Fe deficiency in a P-dependent manner in a  
143 worldwide collection of *A. thaliana* accessions<sup>15</sup>. One way to identify regulatory  
144 mechanisms could be to perform expression genome-wide association studies  
145 (eGWAS) using the expression level of individual genes across Arabidopsis  
146 accessions. Strikingly, we found that expression levels of the 32 genes are  
147 predominantly positively associated with each other across 727 Arabidopsis  
148 accessions (Figure S5A)<sup>15</sup>. We then performed Principal Component Analysis (PCA)  
149 to reduce the dimensionality of these expression data. PC1 explained 89.5% of the  
150 variation in expression of these genes across Arabidopsis accessions (Figure S5B).  
151 The contribution of each accession to PC1 was then used to perform a genome-wide  
152 association study (GWAS) (Figure 3A). Our GWAS analysis detected 38 QTLs  
153 containing 145 candidate genes, based on a 20-kb window per QTL and using a 5%  
154 false discovery rate (FDR) threshold, with the highest peak (Chromosome 2)  
155 occurring in an intergenic region (Figure 3A). In this study, we followed up one of the  
156 QTLs that contained the inorganic phosphate transporter *PHT4;4* (AT4G00370)  
157 (Figure 3A, Figures S6 and S7) given its role in ascorbic acid (AsA) transport into  
158 chloroplasts, which was proposed to be important for maintaining the xanthophyll  
159 cycle for dissipation of excessive light energy to heat in photosynthesis<sup>16</sup>. To  
160 determine if *PHT4;4* has any role in -Fe+P dependent chlorosis, we examined  
161 mutants with a null *pht4;4* allele. Under -Fe+P, chlorophyll was significantly reduced  
162 in *pht4;4* mutants, similar to wild type plants (Figure 3B-C). However, -Fe-P  
163 conditions failed to recover chlorosis and chlorophyll reduction in *pht4;4* mutants,  
164 unlike wild type plants (Figure 3B-C). Introduction of the wild type *PHT4;4* allele into  
165 a *pht4;4* mutant background complemented these phenotypes (Figure 3B-C). The  
166 chlorotic phenotype of the *pht4;4* mutant under -Fe-P suggested that transport of AsA  
167 into chloroplasts could be important for the “stay green” phenotype.

168  
169 To test our hypothesis about the role of AsA in preventing chlorosis under -Fe-P  
170 conditions, we first assessed how Fe and P availabilities regulate the expression of  
171 *VITAMIN C* (*VTC*) enzymes involved in AsA biosynthesis in plants<sup>17</sup>. Our RNA-seq  
172 analysis identified that -Fe-P caused a 2 to 3-fold increase in *VTC1*, *VTC2*, and  
173 *VTC4* expression, which we confirmed using qRT-PCR (Figure 3D). However, -Fe in

174 the presence of P (-Fe+P) caused a 2-fold decrease in the mRNA abundance of  
175 *VTC4* (Figure 3D). *VTC4* is the final enzyme in the AsA biosynthesis pathway<sup>17</sup>. This  
176 prompted us to test the effect of the absence of *VTC4* on chlorophyll accumulation  
177 under -Fe+P and -Fe-P conditions. Under -Fe-P, mutants with a *vtc4* null allele were  
178 still chlorotic, similarly to *pht4;4* and in contrast to wild type plants (Figure 3B-C).  
179 These data show that AsA contributes to preventing chlorosis in -Fe-P conditions.

180

181 Next, we tested whether the chlorotic phenotype is due to variations in AsA levels. In  
182 wild type, AsA levels decreased significantly under -Fe+P at 52 h after the transfer  
183 relative to control (+Fe+P), whereas no change was detected under -Fe-P (Figure  
184 3E), suggesting that AsA levels were associated with -Fe-mediated chlorosis. To test  
185 whether AsA levels were associated with chlorosis in general, we measured AsA  
186 levels in AsA synthesis (*vtc4*) mutant plants. Under +Fe+P, *vtc4* plants accumulated  
187 35% less AsA than wild type plants, and AsA levels remained unchanged in  
188 response to -Fe+P or -Fe-P stress (Figure 3E). However, *vtc4* plants did not show  
189 the chlorotic phenotype under +Fe+P, which indicated that the level of AsA  
190 contributed to the chlorotic phenotype specifically under -Fe and this contribution was  
191 dependent on P availability. In addition, the AsA transporter (*pht4;4*) mutants showed  
192 similar AsA levels as the wild type even though *pht4;4* plants were still chlorotic in -  
193 Fe-P (Figure 3E). To determine whether AsA accumulation in the cell or its transport  
194 to the chloroplast is associated with the development of chlorotic phenotype in -  
195 Fe+P, we tested the effect of an exogenous supply of AsA in wild type, *vtc4*, and  
196 *pht4;4* plants (Figure 3B-C). Exogenous AsA alleviated the chlorosis caused by -  
197 Fe+P in wild type and *vtc4* mutant plants. However, *pht4;4* mutants failed to stay  
198 green under -Fe+P+AsA conditions (Figure 3B-C), indicating that the transport of  
199 AsA to the chloroplast is required for -P mediated 'stay green' phenotype under Fe  
200 deficiency. Our results showed that -P prevents the downregulation of *VTC4* by -Fe  
201 and associated changes in AsA accumulation, and that the *PHT4;4*-mediated  
202 transport of AsA to chloroplasts is required for the maintenance of chlorophyll content  
203 under combined deficiency of Fe and P.

204

205 We next asked whether *PHT4;4*-mediated AsA transport to the chloroplast is  
206 important for regulation of the photosynthesis-related genes that were specifically  
207 down-regulated by -Fe in a P-dependent manner. First, we tested the effects of

208 *PHT4;4* inactivation on the expression of these photosynthesis related genes using  
209 qRT-PCR (Figure 4A). While -Fe+P significantly downregulated the mRNA  
210 abundance of these genes in wild type plants (Col-0), -Fe-P prevented this response  
211 (Figure 4A). Furthermore, adding AsA to -Fe+P mimicked -Fe-P response in  
212 preventing down-regulation of the photosynthesis genes. Under -Fe+P, *pht4;4*  
213 mutant plants showed a decrease in the mRNA abundance of these genes  
214 comparable to wild type plants (Figure 4A). However, in contrast to the wild type,  
215 these genes were still downregulated in *pht4;4* plants under -Fe-P as well as -Fe+P  
216 supplemented with AsA (Figure 4A). Taken together, these data indicate that the  
217 transport of AsA to chloroplasts via *PHT4;4* is central to preventing the  
218 downregulation of photosynthesis-related genes under -Fe-P.

219  
220 How does -Fe+P affect the expression of photosynthesis-related genes? To look for  
221 potential transcriptional regulators of these genes, we examined the candidate genes  
222 from the GWAS analysis. We found that *bZIP58* (AT1G13600) (Figure 3A, Figure S6-  
223 S7), a putative transcription factor, underlies one of the strongest QTL peaks (Figure  
224 3A). To test whether *bZIP58* responds to Fe and P availability, we performed qRT-  
225 PCR of *bZIP58* under various Fe and P availability. *bZIP58* was strongly  
226 downregulated by -Fe, and this down-regulation depended on P availability (Figure  
227 4B). In addition, *bZIP58* was partially required to induce *VTC4* expression under -Fe-  
228 P conditions (Figure 4C). This led us to examine the contribution of *bZIP58* in  
229 regulating the -Fe+P specific photosynthesis-related genes under +Fe+P, -Fe+P, -  
230 Fe-P conditions (Figure 4A). Mutants with the *bzip58* null allele showed a remarkable  
231 constitutive decrease in the expression of these 32 photosynthesis-related genes  
232 (Figure 4A). *bZIP58* localizes to the nucleus (Figure 4D), which is consistent with a  
233 role as a transcription factor. Taken together, these findings support the idea that  
234 *bZIP58* is a key regulator of photosynthesis-related genes, and its absence could  
235 alter chlorophyll accumulation regardless of Fe and P availability. Genetic inactivation  
236 of *bZIP58* indeed causes a constitutive decrease in chlorophyll content, and the  
237 mutant line is chlorotic (Figure 4E-F). The expression of *bZIP58* gene in *bzip58*  
238 plants complements the constitutive chlorosis phenotype, and the complemented line  
239 responds to Fe and P availability similarly to wild type plants (Figure 4E-F).  
240 Furthermore, AsA supplementation could not rescue the chlorotic phenotype of  
241 *bzip58* mutants (Figure 4E-F), indicating that *pZIP58* lies downstream of AsA action.

242 These data show that bZIP58 controls the expression of photosynthesis-related  
243 genes and is transcriptionally regulated in response to -Fe depending on P  
244 availability, likely by mediating the perception of AsA.

245  
246 Based on our findings, we propose a model to explain how P availability modulates  
247 Fe deficiency-induced chlorosis (Figure 4G). -Fe+P causes a decrease in the  
248 expression of AsA biosynthesis gene *VTC4* (Figure 3D). Exogenous AsA supply  
249 prevents the development of chlorosis in *vtc4* under -Fe-P, but not in the *pht4;4* that  
250 transports AsA to the chloroplast (Figure 3B). We thus propose that AsA deficiency in  
251 the chloroplast under Fe limited conditions triggers chlorosis. How does AsA in the  
252 chloroplast affect photosynthesis? AsA has an antioxidizing action that detoxifies  
253 reactive oxygen species (ROS) through its scavenging properties<sup>18</sup>, thus making  
254 ROS a potential signaling molecule<sup>19-21</sup> capable of modulating the expression of  
255 photosynthesis-related genes through bZIP58. To test this hypothesis, we measured  
256 the relative amount of ROS accumulation in shoots of wild type, *pht4;4* and *bzip58*  
257 plants under various Fe and P availability. -Fe+P caused a 2-fold increase in ROS  
258 accumulation in shoots of wild type plants, which partially depended on P availability  
259 (Figure 4H). *pht4;4* plants displayed comparable ROS accumulation to that of the  
260 wild type under +Fe+P and -Fe+P. However, *pht4;4* plants accumulated significantly  
261 higher ROS than wild type plants under -Fe-P (Figure 4H). In addition, *bzip58* mutant  
262 plants displayed a constitutive increase in ROS accumulation (Figure 4H). To check  
263 whether ROS in turn can regulate the expression of *bZIP58*, we quantified *bZIP58*  
264 expression in response to foliar application of H<sub>2</sub>O<sub>2</sub>. ROS treatment caused a 4-fold  
265 decrease in *bZIP58* transcript accumulation (Figure 4B). Collectively, our results  
266 support the idea that under simultaneous Fe and P deficiency, AsA accumulation in  
267 the chloroplast prevents chlorosis by modulating ROS levels that may control the  
268 expression of photosynthesis genes via a putative transcription factor bZIP58 (Figure  
269 4G). How ROS acts as a retrograde signal to alter nuclear gene expression to control  
270 photosynthesis under Fe and P limitation remains to be determined, though we now  
271 have several molecular targets with which to explore this field. Modulation of the  
272 discovered pathway could have a direct impact on plant growth in the field by  
273 improving plant photosynthetic activity while reducing nutrient supply.

274

275 **References**



- 276 1 Myouga, F. *et al.* The Chloroplast Function Database: a large - scale  
277 collection of Arabidopsis Ds/Spm - or T - DNA - tagged homozygous lines for  
278 nuclear - encoded chloroplast proteins, and their systematic phenotype  
279 analysis. *Plant J.* **61**, 529-542 (2010).
- 280 2 Chen, Y. & Barak, P. Iron nutrition of plants in calcareous soils. *Adv. Agron.*  
281 **35**, 217-240 (1982).
- 282 3 Carstensen, A. *et al.* The impacts of phosphorus deficiency on the  
283 photosynthetic electron transport chain. *Plant Physiol.* **177**, 271-284 (2018).
- 284 4 Terry, N. & Abadía, J. Function of iron in chloroplasts. *J. Plant Nutr.* **9**, 609-  
285 646 (1986).
- 286 5 Terry, N. & Low, G. Leaf chlorophyll content and its relation to the intracellular  
287 localization of iron. *J. Plant Nutr.* **5**, 301-310 (1982).
- 288 6 Lill, R. Function and biogenesis of iron–sulphur proteins. *Nature* **460**, 831  
289 (2009).
- 290 7 Briat, J.-F., Dubos, C. & Gaymard, F. Iron nutrition, biomass production, and  
291 plant product quality. *Trends Plant Sci.* **20**, 33-40 (2015).
- 292 8 Balk, J. & Pilon, M. Ancient and essential: the assembly of iron–sulfur clusters  
293 in plants. *Trends Plant Sci.* **16**, 218-226 (2011).
- 294 9 Marschner, H. *Mineral nutrition of higher plants. 2nd.* (Academic Press,  
295 Elsevier, 1995).
- 296 10 DeKock, P. C., Hall, A. & Inkson, R. H. E. Active iron in plant leaves. *Ann. Bot.*  
297 **43**, 737-740 (1979).
- 298 11 Saenchai, C. *et al.* The involvement of OsPHO1; 1 in the regulation of iron  
299 transport through integration of phosphate and zinc deficiency signaling. *Front.*  
300 *Plant Sci.* **7**, 396 (2016).
- 301 12 Bournier, M. *et al.* Arabidopsis ferritin 1 (*AtFer1*) gene regulation by the  
302 phosphate starvation response 1 (*AtPHR1*) transcription factor reveals a direct  
303 molecular link between iron and phosphate homeostasis. *J. Biol. Chem.* **288**,  
304 22670-22680 (2013).
- 305 13 Bertamini, M., Nedunchezian, N. & Borghi, B. Effect of iron deficiency  
306 induced changes on photosynthetic pigments, ribulose-1, 5-bisphosphate  
307 carboxylase, and photosystem activities in field grown grapevine (*Vitis vinifera*  
308 L. cv. Pinot noir) leaves. *Photosynthetica* **39**, 59-65 (2001).
- 309 14 Liu, W. *et al.* The ethylene response factor *AtERF4* negatively regulates the  
310 iron deficiency response in *Arabidopsis thaliana*. *PLoS ONE* **12**, e0186580  
311 (2017).
- 312 15 Kawakatsu, T. *et al.* Epigenomic diversity in a global collection of Arabidopsis  
313 thaliana accessions. *Cell* **166**, 492-505 (2016).
- 314 16 Miyaji, T. *et al.* *AtPHT4; 4* is a chloroplast-localized ascorbate transporter in  
315 Arabidopsis. *Nat. Commun.* **6**, 5928 (2015).
- 316 17 Torabinejad, J., Donahue, J. L., Gunesequera, B. N., Allen-Daniels, M. J. &  
317 Gillaspay, G. E. VTC4 is a bifunctional enzyme that affects myoinositol and  
318 ascorbate biosynthesis in plants. *Plant Physiol.* **150**, 951-961 (2009).
- 319 18 Noctor, G. & Foyer, C. H. Ascorbate and glutathione: keeping active oxygen  
320 under control. *Annu. Rev. Plant Biol.* **49**, 249-279 (1998).
- 321 19 Finkel, T. Signal transduction by reactive oxygen species. *J. Cell Biol.* **194**, 7-  
322 15 (2011).
- 323 20 Shapiguzov, A., Vainonen, J., Wrzaczek, M. & Kangasjärvi, J. ROS-talk—how  
324 the apoplast, the chloroplast, and the nucleus get the message through. *Front.*  
325 *Plant Sci.* **3**, 292 (2012).

- 326 21 Shaikhali, J. & Wingsle, G. Redox-regulated transcription in plants: emerging  
327 concepts. *AIMS Mol. Sci.* **4**, 301 (2017).
- 328 22 Warde-Farley, D. *et al.* The GeneMANIA prediction server: biological network  
329 integration for gene prioritization and predicting gene function. *Nucleic Acids*  
330 *Res.* **38**, W214-W220 (2010).
- 331 23 Haydon, M. J. *et al.* Vacuolar nicotianamine has critical and distinct roles  
332 under iron deficiency and for zinc sequestration in *Arabidopsis*. *Plant Cell* **24**,  
333 724-737 (2012).
- 334 24 Yoshida, S., Forno, D. A. & Cock, J. H. *Laboratory manual for physiological*  
335 *studies of rice*. (International Rice Research Institute, 1976).
- 336 25 Baker, N. R. Chlorophyll fluorescence: a probe of photosynthesis in vivo.  
337 *Annu. Rev. Plant Biol.* **59**, 89-113 (2008).
- 338 26 Zhang, J., Han, C. & Liu, Z. Absorption spectrum estimating rice chlorophyll  
339 concentration: preliminary investigations. *J. Plant Breed. Crop Sci.* **1**, 223-229  
340 (2009).
- 341 27 Gillespie, K. M. & Ainsworth, E. A. Measurement of reduced, oxidized and  
342 total ascorbate content in plants. *Nat. Protoc.* **2**, 871-874 (2007).
- 343 28 Alexieva, V., Sergiev, I., Mapelli, S. & Karanov, E. The effect of drought and  
344 ultraviolet radiation on growth and stress markers in pea and wheat. *Plant Cell*  
345 *Environ.* **24**, 1337-1344 (2001).
- 346 29 Gechev, T., Mehterov, N., Denev, I. & Hille, J. A simple and powerful  
347 approach for isolation of *Arabidopsis* mutants with increased tolerance to  
348 H<sub>2</sub>O<sub>2</sub>-induced cell death. *Methods Enzymol.* **527**, 203-220 (2013).
- 349 30 Kim, D., Langmead, B. & Salzberg, S. L. HISAT: a fast spliced aligner with low  
350 memory requirements. *Nat. Methods* **12**, 357-360 (2015).
- 351 31 Afgan, E. *et al.* The Galaxy platform for accessible, reproducible and  
352 collaborative biomedical analyses: 2018 update. *Nucleic Acids Res.* **46**,  
353 W537-W544 (2018).
- 354 32 Love, M. I., Huber, W. & Anders, S. Moderated estimation of fold change and  
355 dispersion for RNA-seq data with DESeq2. *Genome Biol.* **15**, 550 (2014).
- 356 33 Rouached, H. *et al.* Differential regulation of the expression of two high-affinity  
357 sulfate transporters, SULTR1. 1 and SULTR1. 2, in *Arabidopsis*. *Plant Physiol.*  
358 **147**, 897-911 (2008).
- 359 34 Consortium, O. T. O. G. 1,135 genomes reveal the global pattern of  
360 polymorphism in *Arabidopsis thaliana*. *Cell* **166**, 481-491 (2016).
- 361 35 Seren, Ü. *et al.* GWAPP: a web application for genome-wide association  
362 mapping in *Arabidopsis*. *Plant Cell* **24**, 4793-4805 (2012).
- 363 36 Benjamini, Y. & Hochberg, Y. Controlling the false discovery rate: a practical  
364 and powerful approach to multiple testing. *J. R. Stat. Soc.* **57**, 289-300 (1995).
- 365 37 Spitzer, M., Wildenhain, J., Rappsilber, J. & Tyers, M. BoxPlotR: a web tool for  
366 generation of box plots. *Nat. Methods* **11**, 121 (2014).

367  
368

## Figure Legends

369 **Figure1. Phosphorus deficiency prevents iron deficiency-induced chlorosis in**  
370 **evolutionarily distant plant species. A-C)** Duckweed (*Lemna gibba*), rice (*Oryza*  
371 *sativa* cv Nipponbare), and *Arabidopsis thaliana* plants grown on media containing  
372 iron and phosphorus (+Fe+P), deficient in iron (-Fe+P), or deficient in both elements

373 (-Fe-P). Representative images of *L. gibba* propagated for 28 days (A), 24-day old  
374 rice (B) and 14-day old *A. thaliana* (Col-0) (C) are shown. **D**) Chlorophyll  
375 accumulation in *L. gibba*, *A. thaliana*, and *O. sativa* grown under +Fe+P, -Fe+P, and -  
376 Fe-P conditions. Scale bars, 7 mm (A), 10 mm (B), and 5 mm (C). Data shown are  
377 from 3 experiments and 3-10 plants per experiment. Error bars represent 95%  
378 confidence interval. FW, fresh weight. **E**) Iron content in shoots of *A. thaliana* plants  
379 grown on agar plates containing +Fe+P, -Fe+P, or -Fe-P. Data shown are from 3  
380 experiments and 10 plants per experiment. Error bars represent 95% confidence  
381 interval. DW, dry weight. **F**) mRNA abundance of *FERRITIN1* (*AtFER1*) relative to  
382 *Ubiquitin 10* (*At4g05320*) in *A. thaliana* shoots grown under +Fe+P, -Fe+P, or -Fe-P.  
383 Data shown from 3 experiments, with above-ground tissue from 5 plants pooled per  
384 experiment for RNA extraction. Error bars represent 95% confidence interval. For D-  
385 F, letters above bars represent statistically different means at  $P < 0.05$  (one-way  
386 ANOVA with a Duncan post-hoc test). Source data are provided as a Source Data  
387 file.

388

389 **Figure 2. Kinetics of chlorophyll accumulation, photosystem II activity, and**  
390 **transcriptome change in response to iron and phosphorus availability. A-B)**  
391 Chlorophyll content and PSII activity (Fv/Fm) in response to iron and/or phosphate  
392 deficiency in *A. thaliana*. Seedlings were grown for 7 days in the presence of iron and  
393 phosphorus (+Fe+P) and transferred to three different media: +Fe+P, -Fe+P, or -Fe-  
394 P for 15h, 28h, 39h, 52h, 76h, 100h, 124h, 148h, 172h. **A**) Chlorophyll data shown  
395 are from 3 experiments, each experiment with 8 plants. Error bars represent 95%  
396 confidence interval. **B**) Plants were dark-adapted for 30 min before measuring  
397 fluorescence kinetics from a leaf. Fv/Fm data shown are from 3 experiments, each  
398 experiment with 16 plants. Error bars represent 95% confidence interval. **C**)  
399 Experimental design for transcriptomic studies on *A. thaliana* (Col-0) shoots. Plants  
400 were grown in media containing iron and phosphorus (+Fe+P) for 7 days, transferred  
401 to three different media (+Fe+P, -Fe+P, or -Fe-P) for 39h, 52h, or 76h, and shoots  
402 were harvested for RNA extraction and sequencing. **D**) Global expression analysis of  
403 genes in response to -Fe+P and -Fe-P relative to +Fe+P. Numbers of genes  
404 displaying at least 2-fold change ( $p$ -value  $< 0.05$ ) in their expression are shown for

405 each condition. The 32 genes that were decreased specifically in -Fe+P but not in -  
406 Fe-P relative to +Fe+P at 52h and 76h (highlighted in purple) were used to perform  
407 genome-wide association studies. **E)** A heatmap showing gene expression patterns  
408 of the 32 genes in -Fe+P and -Fe-P relative to control (+Fe+P) at 39h, 52h, 76h after  
409 the transfer. LogFC, log2 fold change. **F)** Gene Ontology analysis for the biological  
410 processes (GO-BP) for the 32 genes whose mRNA abundance was specifically  
411 decreased by -Fe+P. FDR = false discovery rate. Source data are provided as a  
412 Source Data file.

413  
414 **Figure 3. PHT4;4 prevents chlorosis under the combined deficiency of iron and**  
415 **phosphorus. A)** A Manhattan plot for genome-wide association mapping using  
416 principal component 1 that explained 89.5% of expression variation of the 32  
417 photosynthesis related genes across 727 *A. thaliana* accessions<sup>15</sup>. The five  
418 chromosomes are depicted by light and dark blue colors. Dashed lines correspond to  
419 FDR 5% threshold (blue) and Bonferroni  $\alpha = 0.05$  (red). The light grey rectangle  
420 highlights a significant association located in an intergenic region (SNP: 4493712).  
421 Two significant associations that were followed up in this study are highlighted in red  
422 rectangles. **B)** Representative images of wild-type Col-0, *pht4;4*, *vtc4*, and a line  
423 expressing genomic *PHT4;4* in *pht4;4* (*pht4;4-CL*) grown for 7 days in the presence  
424 of iron and phosphorus (+Fe+P) and transferred to three different media: +Fe+P, -  
425 Fe+P, or -Fe-P for 7 additional days. Scale bars: 7 mm **C)** Total chlorophyll content in  
426 Col-0, *pht4;4*, *vtc4*, and *PHT4;4-CL* grown under -Fe+P, +Fe-P, -Fe-P, or -  
427 Fe+P+AsA. Data shown are from 10 plants conducted in three independent  
428 experiments. **D)** mRNA abundance of *VTC* genes (*VTC1*, *VTC2*, and *VTC4*) relative  
429 to *Ubiquitin 10* (*At4g05320*) in shoots of *A. thaliana* Col-0 plants grown in the  
430 presence of iron and phosphorus (+Fe+P) for 7 days and transferred to +Fe+P, -  
431 Fe+P, -Fe-P or -Fe-P+AsA for 52h. Data shown are from 3 experiments. Error bars  
432 represent 95% confidence interval. **E)** Total ascorbic acid (AsA) content in Col-0,  
433 *pht4;4*, *vtc4*, and *PHT4;4-CL* plants grown for 7 days in the presence of iron and  
434 phosphorus (+Fe+P) and transferred to +Fe+P, -Fe+P, or -Fe-P for 52h. Data shown  
435 are from 3 experiments, each with 16 plants. In box plots (C, E) center lines show  
436 sample medians; box limits indicate the 25th and 75th percentiles; whiskers extend

437 1.5 times the interquartile range from the 25th and 75th percentiles. For C-E, letters  
438 above bars or boxes represent statistically different means at  $P < 0.05$  (one-way  
439 ANOVA with a Duncan post-hoc test). Data points are plotted as open circles. Source  
440 data are provided as a Source Data file.

441

442 **Figure 4. bZIP58 regulates photosynthesis related genes and chlorophyll**

443 **accumulation. A)** mRNA abundance of 32 photosynthesis-related genes relative to

444 *Ubiquitin 10* in shoots of *A. thaliana* Col-0, *pht4;4*, and *bzip58* plants grown for 7 days

445 in the presence of iron and phosphorus (+Fe+P) and transferred to +Fe+P, -Fe+P, -

446 Fe-P, or -Fe-P+AsA for 52h. Data were averaged from three independent

447 experiments. Scale bar represents the relative mRNA abundance. **B)** mRNA

448 abundance of *bZIP58* relative to *Ubiquitin 10* in *A. thaliana* Col-0 shoots of plants

449 grown for 7 days on +Fe+P and transferred to +Fe+P, -Fe+P, -Fe-P, or +Fe+P+H<sub>2</sub>O<sub>2</sub>

450 for 52h. Data are shown from 3 experiments. Error bars represent 95% confidence

451 interval. **C)** *VTC4* mRNA abundance relative to *Ubiquitin 10* in the shoots of Col-0

452 and *bzip58* mutants grown in the presence of +Fe+P for 7 days and transferred to

453 +Fe+P, -Fe+P, or -Fe-P for 52h. Data shown from 3 experiments. Error bars

454 represent 95% confidence interval. **D)** Confocal microscopy images of

455 p35S::bZIP58::GFP expressing plants (scale bar = 20  $\mu$ m) grown for 7 days under

456 +Fe+P. **E)** Representative images of Col-0, *bzip58*, and a line expressing genomic

457 *bZIP58* in *bzip58* mutants (*bzip58-CL*) grown for 7 days in +Fe+P and transferred to

458 +Fe+P, -Fe+P, or -Fe-P for 7 additional days. Scale bars: 7 mm. **F)** Total chlorophyll

459 content in Col-0, *bzip58*, and *bZIP58-CL* plants grown for 7 days in +Fe+P and

460 transferred to -Fe+P, +Fe-P, -Fe-P, or -Fe-P+AsA for 7 days. Data shown are from 4

461 experiments. **G)** A schematic model delineating a signaling pathway that integrates

462 Fe and P availability cues to regulate chlorophyll accumulation and photosynthesis

463 genes. Fe deficiency (-Fe+P) causes a decrease in the expression of *bZIP58* that is

464 central to controlling the transcription of nuclear-encoded photosynthetic genes. P

465 limitation under Fe deficiency (-Fe-P) prevents this downregulation of *bZIP58* and

466 induces *VTC4*. The induction of *VTC4* expression requires bZIP58, whose effect

467 could be direct or indirect, represented here by 'X'. We propose that induction of

468 *VTC4* increases ascorbic acid in the chloroplast mediated by PHT4;4. We

469 hypothesize that the increase of ascorbic acid level prevents ROS accumulation, thus  
470 maintaining the expression of bZIP58 and its downstream photosynthesis genes  
471 leading to the 'stay green' phenotype. **H**) Accumulation of H<sub>2</sub>O<sub>2</sub> (a type of ROS) in  
472 shoots of Col-0, *bzip58*, and *bZIP58-CL* plants grown for 7 days in +Fe+P and  
473 transferred to +Fe+P, -Fe+P, or -Fe-P for 52h. Data shown from 12 experiments. In  
474 box plots (F, H) center lines show sample medians; box limits indicate the 25th and  
475 75th percentiles; whiskers extend 1.5 times the interquartile range from the 25th and  
476 75th percentiles. For B, C, F, H, letters above bars or boxes represent statistically  
477 different means at  $P < 0.05$  (one-way ANOVA with a Duncan post-hoc test). Data  
478 points are plotted as open circles. Source data are provided as a Source Data file.

479

## 480 **Supplemental Figures**

481 **Figure S1. Photosystem II activity in response to Fe and/or P deficiency in *A.***  
482 ***thaliana*.** Seedlings were grown for 7 days in the presence of Fe and P (+Fe+P) and  
483 transferred to three different media: +Fe+P, -Fe+P, or -Fe-P for 15h, 28h, 39h, 52h,  
484 76h, 100h, 124h, 148h, 172h. Plants were dark-adapted for 30 min before measuring  
485 the kinetics of fluorescence from a leaf. Data shown are from 3 experiments and 13  
486 to 16 plants were measured per experiment. Error bars represent 95% confidence  
487 interval. Source data are provided as a Source Data file.

488

489 **Figure S2. Transcriptome kinetics of *A. thaliana* in response to Fe and/or P**  
490 **deficiency.** Volcano plots of individual transcript abundance in wild-type plants (Col-  
491 0) grown in -Fe+P (A,C,E) or -Fe-P (B,D,F) relative to +Fe+P. Shoot samples were  
492 collected from plants grown for 39h (A,B), 52h (C,D), or 76h (E,F). x-axis: fold-  
493 changes; y-axis: adjusted p-values based on Benjamini-Hochberg correction; Both  
494 axes use log scales. Red:  $\log_2\text{FoldChange} > |2|$  and  $-\log_{10}P > 6$ ; Blue:  
495  $\log_2\text{FoldChange} < |2|$  and  $-\log_{10}P > 6$ ; Green:  $\log_2\text{FoldChange} > |2|$  and  $-\log_{10}P < 6$ ;  
496 Grey:  $\log_2\text{FoldChange} < |2|$  and  $-\log_{10}P < 6$ .

497

498 **Figure S3. Common and unique genes regulated by Fe and/or P deficiency. A-**  
499 **C)** Venn diagrams show the genes that are commonly and specifically increased or  
500 decreased in abundance in shoots of *A. thaliana* wild type (Col-0) plants grown in

501 +Fe+P for 7 days and transferred to -Fe+P or -Fe-P for 39h, 52h, or 76h relative to  
502 those transferred to +Fe+P (fold change >2,  $p < 0.05$ ). The Venn diagram was  
503 constructed using a web-based tool  
504 (<http://bioinformatics.psb.ugent.be/webtools/Venn/>).  $p$  = p-values from  
505 hypergeometric testing.

506

507 **Figure S4. Gene Ontology enrichment analysis of genes specifically regulated**  
508 **by Fe and/or P deficiency. A, C)** Heatmaps representing changes in the expression  
509 of genes that were specifically decreased in abundance under -Fe-P but not -Fe+P  
510 relative to +Fe+P (**A**) and increased in abundance in -Fe-P but not in -Fe+P relative  
511 to +Fe+P (**C**). **E)** A heatmap representing the expression of genes specifically  
512 upregulated by -Fe+P but not by -Fe-P relative to +Fe+P. **B, D, F)** Gene Ontology  
513 enrichment for biological processes (GO-BP) in the genes that were specifically  
514 decreased by -Fe-P relative to +Fe+P (**B**), specifically increased by -Fe-P relative to  
515 +Fe+P (**D**), and specifically increased by -Fe+P relative to +Fe+P (**F**) using  
516 GENEMANIA<sup>22</sup>. Number of genes in each functional category and adjusted p-values  
517 for the enrichment are shown. FDR = false discovery rate.

518

519 **Figure S5. Correlation in the expression of the 32 photosynthesis genes**  
520 **specifically downregulated by -Fe+P across 727 *A. thaliana* accessions. A)** A  
521 heatmap of pairwise correlations (Pearson's correlation coefficient) in the 32 genes  
522 across 727 *Arabidopsis* accessions grown under control conditions. The correlations  
523 were calculated using normalized read counts. **B)** Principal Component (PC) Analysis  
524 was performed using the expression of 32 genes in 727 *Arabidopsis* accessions. X-  
525 and Y-axes show PC 1 and PC 2 that explain 89.5% and 5.9 % of the total variance,  
526 respectively.

527

528 **Figure S6. A close-up view of chromosomes 1 and 4 around bZIP58 and**  
529 **PHT4;4 respectively.** A Manhattan plot for genome-wide association mapping using  
530 PC 1 of the expression profile of the 32 photosynthesis genes across 727  
531 accessions. The five *A. thaliana* chromosomes are depicted by light and dark blue  
532 colors. Blue and red horizontal dashed lines correspond to FDR 5% threshold and

533 Bonferroni  $\alpha = 0.05$ , respectively. Light blue rectangles indicate the significant SNPs  
534 identified in this study. Below the Manhattan plot shows gene models located within a  
535 20-kb genomic region surrounding the two QTLs pursued in this study. Source data  
536 are provided as a Source Data file.

537  
538 **Figure S7. Effects of Fe and/or P availability on chlorophyll content in *A.***  
539 ***thaliana* Col-0 and mutants of candidate genes identified using GWAS.**

540 Chlorophyll content in Col-0 (CS60000), T-DNA insertion mutant lines in AT1G13570  
541 (SALK\_139877), AT1G13580 (SALK\_150849), AT1G13590 (SALK\_063177),  
542 AT1G13605 (SALK\_087271), AT1G13607 (SALK\_130208), AT1G13608  
543 (SALK\_023173), AT1G13609 (SAIL\_1243\_E04), AT1G13610 (SAIL\_897\_D11),  
544 At4g00355 (N469134), AT4G00360 (SALK\_128714), AT4G00380 (SAIL\_842\_E09),  
545 AT4G03585 (SALK\_128714), At4g00390 (SAIL\_313\_F07), and At4g00400  
546 (SAIL\_633\_E10) grown for 7 days in the presence of iron and phosphorus (+Fe+P)  
547 and transferred to +Fe+P, -Fe+P, or -Fe-P for an additional week. Data shown from 3  
548 experiments. Error bars represent 95% confidence interval. Letters a and b indicate  
549 significantly different values at  $p < 0.05$  determined by one-way ANOVA and Tukey's  
550 honest significant difference (HSD) tests. Source data are provided as a Source Data  
551 file.

552  
553 **Supplemental tables**

554  
555 **Table S1. Differentially expressed genes in response to iron and/or**  
556 **phosphorus deficiency in *A. thaliana*.** Gene transcript levels were determined in  
557 shoots of Col-0 plants grown in control (+Fe+P) condition for 7 days and then  
558 transferred to -Fe+P, -Fe-P, or +Fe+P for 39h, 52h, or 76h.

559  
560 **Table S2.** List of primers used in this study.

561  
562 **Materials and Methods**

563 *Plants and growth conditions*



564 Seeds of *Arabidopsis thaliana* wild type (ecotype Columbia, Col-0, CS60000) and  
565 knock-out mutant lines SALK\_139877 (AT1G13570), SALK\_150849 (AT1G13580),  
566 SALK\_063177 (AT1G13590), N571881 (AT1G13600), SALK\_087271 (AT1G13605),  
567 SALK\_130208 (AT1G13607), SALK\_023173 (AT1G13608), SAIL\_1243\_E04  
568 (AT1G13609), SAIL\_897\_D11 (AT1G13610), N469134 (At4g00355), SALK\_128714  
569 (AT4G00360), N469134 (AT4G00370), SAIL\_842\_E09 (AT4G00380), N866595  
570 (At4g00390), SAIL\_633\_E10 (At4g00400) and SALK\_077222 (AT3G02870) were  
571 obtained from the Nottingham Arabidopsis Stock Centre (NASC). Homozygous  
572 mutant lines were confirmed by PCR using the primers listed in Table S2. bZIP58  
573 complemented lines (bZIP58-CL) were generated by expressing 3896 bp genomic  
574 DNA containing *bZIP58* in the *bzip58* mutant background (NASC, N571881).  
575 Complementation of *pht4;4* mutant plants (PHT4;4-CL) was obtained by expressing  
576 6450 bp genomic DNA containing *PHT4;4* in the *pht4;4* mutant background (NASC,  
577 N469134). Arabidopsis plants were grown on control (+Fe+P) plates containing 1.249  
578 mM  $\text{KH}_2\text{PO}_4$ ; 0.25 mM  $\text{Ca}(\text{NO}_3)_2$ ; 0.5 mM  $\text{KNO}_3$ ; 1 mM  $\text{MgSO}_4$ ; 100  $\mu\text{M}$   
579  $\text{FeSO}_4 \cdot 7\text{H}_2\text{O}$ ; 30  $\mu\text{M}$   $\text{H}_3\text{BO}_3$ ; 1  $\mu\text{M}$   $\text{ZnCl}_2$ ; 10  $\mu\text{M}$   $\text{MnCl}_2$ ; 1  $\mu\text{M}$   $\text{CuCl}_2$ ; 0.1  $\mu\text{M}$   
580  $(\text{NH}_4)_6\text{Mo}_7\text{O}_{24}$ ; and 50  $\mu\text{M}$   $\text{KCl}$ ; 0.05% 2-(N-morpholino)ethanesulfonic acid (MES),  
581 without sucrose supplementation, and 0.8% washed agar. The agar was washed 3  
582 times with 50 mM EDTA, pH 5.7, with continuous stirring for 16 h, then washed 6  
583 times with Milli-Q de-ionized water for 2 hours to reduce mineral contamination<sup>23</sup>. P-  
584 deficient media contained 12.49  $\mu\text{M}$   $\text{KH}_2\text{PO}_4$  (+Fe-P). Fe-free media was obtained by  
585 omitting  $\text{FeSO}_4 \cdot 7\text{H}_2\text{O}$  from the growth media (-Fe+P). P- and Fe-deficient media  
586 contained 12.49  $\mu\text{M}$   $\text{KH}_2\text{PO}_4$  (+Fe-P), and no  $\text{FeSO}_4 \cdot 7\text{H}_2\text{O}$  (-Fe-P). Seeds were  
587 stratified at 4°C for 3 days and grown on vertical agar plates in a growth chamber  
588 with 22 °C, 24 h of light at 100  $\mu\text{mol m}^{-2}\text{s}^{-1}$  fluorescent illumination. *Lemna gibba*  
589 (duckweed) plants used during this study were obtained from Duckweeds stock  
590 center (stock number 29-DWC131) at Rutgers University (USA). Duckweed plants  
591 were grown in 1X Schenk & Hildebrandt (SH) hydroponic medium containing 0.05%  
592 2-(N-morpholino)ethanesulfonic acid (MES) and 1% sucrose, and pH adjusted to 5.7.  
593 For experiments with duckweeds, P-deficient and Fe-deficient media contained 1%  
594  $\text{NH}_4\text{H}_2\text{PO}_4$  and 1%  $\text{FeSO}_4 \cdot 7\text{H}_2\text{O}$ , respectively, of 1X SH media. Media were changed  
595 every 7 days. The growth condition was 22 °C and 24 h of light at 80  $\mu\text{mol m}^{-2}\text{s}^{-1}$ .

596 Rice (*Oryza sativa* cv Nipponbare) plants were grown hydroponically in 0.25X  
597 Yoshida media<sup>24</sup> under light/dark cycle of 14/10 h, and temperature of 28/25 °C.  
598 Single (-P or -Fe) and combined (-P-Fe) nutrient deficiency stresses were applied to  
599 10 day-old plants. NaH<sub>2</sub>PO<sub>4</sub> (0.33 mM) and Fe-NaEDTA (0.04 mM) present in the  
600 complete media were omitted in the P- and/or Fe-deficient media.

601

#### 602 *Iron concentration measurement*

603 Arabidopsis seeds were germinated and grown in the control (+Fe+P) media for 7  
604 days, and then transferred to +Fe+P, iron deficient (-Fe+P), phosphate deficient  
605 (+Fe-P), or iron and phosphate deficient (-Fe-P) conditions and grown for 7 additional  
606 days. Plants were harvested and shoot samples were dried at 70 °C for 3 days. Total  
607 iron was extracted by acid digestion in 1N nitric acid using MARSX (CEM) microwave  
608 digester. A 1:10 dilution of the digested material was used to quantify total iron with  
609 inductively coupled plasma-atomic emission spectrometry (ICP-OES).

610

#### 611 *Analysis of photosystem II activity*

612 Photosystem II (PSII) activity was defined as the maximum quantum yield of the  
613 primary quinone acceptor PSII, which was estimated by the ratio of variable  
614 fluorescence (Fv) and maximal fluorescence (Fm) of the chlorophyll, Fv/Fm<sup>25</sup>.  
615 Arabidopsis wild type (Col-0) seeds were germinated and grown in control (+Fe+P)  
616 for 7 days then transferred to three different media: +Fe+P, iron deficient (-Fe+P),  
617 and iron and phosphate deficient (-Fe-P) conditions for 0 h (time of the transfer), 15  
618 h, 28 h, 39 h, 52 h, 76 h, 100 h, 124 h, 148 h, and 172 h. Plates containing the  
619 seedlings were dark adapted for 30 minutes followed by a very short (160 μs)  
620 exposure to a blue measuring beam to determine the minimal fluorescence (F0). The  
621 intensity of the detecting and the continuous illumination used was of 156 μE m<sup>-2</sup>s<sup>-1</sup>.  
622 A saturating light flash (2600 μE m<sup>-2</sup>s<sup>-1</sup>, 250 ms) was applied to measure the  
623 maximum fluorescence (Fm). Kinetics were normalized to the maximum fluorescence  
624 (Fm). The maximum quantum yield of Photosystem II (Fv/Fm = (Fm – F0)/Fm) was  
625 measured for each growth condition<sup>25</sup>.

626

#### 627 *Chlorophyll content measurement*

628 Seeds of Arabidopsis genotypes were germinated and grown in control (+Fe+P)  
629 media for 7 days then transferred to three different media: +Fe+P, iron deficient (-  
630 Fe+P), and iron and phosphate deficient (-Fe-P) conditions. Fresh leaves (~30mg)  
631 were incubated in 2.5mL of 80% acetone overnight in the dark at 4°C. Total  
632 chlorophyll content was measured using a UV-VIS spectrophotometer (Beckman  
633 Coulter, DU 530). The absorbance of the supernatant was measured at 645 nm and  
634 633 nm. The concentration of total chlorophyll, chlorophyll a, and chlorophyll b were  
635 calculated as described previously<sup>26</sup>.

636

#### 637 *Ascorbic acid content determination*

638 Seeds of Arabidopsis genotypes were germinated and grown in control (+Fe+P)  
639 media and then transferred to +Fe+P, -Fe+P, or -Fe-P media for 76h. Ascorbic acid  
640 (AsA) content was measured by a colorimetric assay as described previously<sup>27</sup>.  
641 Briefly, shoots were collected and homogenized in ice-cold 6% trichloroacetic acid  
642 (TCA) (Sigma Aldrich). In the supernatant, Fe<sup>3+</sup> (ferric ion) is reduced by AsA to the  
643 Fe<sup>2+</sup> (ferrous ion) that, when coupled with 2,2-dipyridyl, forms a complex with a  
644 characteristic absorbance at 525 nm. A standard curve was generated using known  
645 concentrations of AsA made in 6% TCA to determine the AsA concentration. Blanks  
646 were prepared using only 6% TCA. AsA concentration was expressed as  $\mu\text{mol g}^{-1}$   
647 fresh weight.

648

#### 649 *Hydrogen peroxide quantification*

650 Seeds of Arabidopsis genotypes were germinated and grown in control (+Fe+P)  
651 media and then transferred to +Fe+P, -Fe+P, or -Fe-P media for 76h. Hydrogen  
652 peroxide (H<sub>2</sub>O<sub>2</sub>) (Sigma-Aldrich) was quantified as described previously<sup>28,29</sup>. Fresh  
653 shoot tissues (0.2g) were homogenized with 0.1% (w/v) TCA and were centrifuged at  
654 12,000g for 15 min at 4°C. 0.5 ml of supernatant was added to 0.5 ml of 10 mM  
655 potassium phosphate buffer (pH 7.0) and 1 ml of 1 M potassium iodide. The  
656 absorbance of the reaction mixture was measured at 390 nm. The amount of H<sub>2</sub>O<sub>2</sub>  
657 was calculated using a standard curve prepared from known concentrations of H<sub>2</sub>O<sub>2</sub>  
658 ranging from 0.1 to 1 mM.

659

## 660 *RNA-seq experiments*

661 Arabidopsis wild type (Col-0) plants were grown in control (+Fe+P) media for 7 days  
662 and transferred to three different media: control (+Fe+P), iron deficiency (-Fe+P), and  
663 iron and phosphate deficiency (-Fe-P) conditions. Shoots were collected at 39h, 52h  
664 and 76h after the transfer. For RNA-seq experiments, three biological replicates were  
665 prepared for each time point (39h, 52h and 76h) and each condition (+Fe+P, -Fe+P  
666 and -Fe-P) for a total of 27 samples. Total RNA was extracted from these samples  
667 using RNeasy Plant Mini Kit (QIAGEN) using the RLT buffer supplemented with 2-  
668 mercaptoethanol, and RNA quality was verified using an Agilent 2100 BioAnalyzer.  
669 The mRNAs were subsequently isolated using magnetic KAPA Biosystems oligo-dT  
670 beads from KAPA Biosystems (Roche) and then used for library construction using  
671 the KAPA Biosystems RNA HyperPrep Kit (Roche). To index the libraries, we used  
672 adapters from the KAPA Biosystems Single-Indexed Adapter Set A+B (Roche).  
673 Before pooling the libraries, we monitored their quality and concentrations using an  
674 Agilent 2100 BioAnalyzer, Qubit dsDNA HS Assay Kit (Thermo Fisher Scientific) and  
675 the KAPA Library Quantification Kit (Roche). Pooled libraries were then sequenced  
676 using the NextSeq 500 System at the Stanford Functional Genomics Facility  
677 (Stanford, CA). Raw reads were demultiplexed and aligned to the TAIR10 genome  
678 annotation using HISAT2<sup>30</sup> on the Galaxy web platform<sup>31</sup>. Finally, mapped read  
679 counts were used to perform normalization and a differential expression analysis on  
680 R using the DESeq2<sup>32</sup> and TxDB.Athaliana.BioMart.plantsmart<sup>28</sup> (Bioconductor)  
681 packages. In DESeq2, p-values from the Wald test were corrected for multiple  
682 hypothesis testing using the Benjamini and Hochberg method. A transcript was  
683 considered differentially expressed if the adjusted p-value < 0.05. Volcano plots were  
684 generated using the EnhancedVolcano package (version 1.6.0) (Bioconductor) with a  
685 default cut-off of  $\log_2(\text{Fold Change}) > |2|$  and adjusted p value <  $10e^{-6}$ . DEGs having  
686 a p-value of 0 were converted to  $10^{-1}$  x lowest non-zero p-value.

687

## 688 *Real-time quantitative reverse-transcription PCR*

689 Seeds of Arabidopsis wild type (Col-0), *bzip58*, and *pht4;4* mutant plants were  
690 germinated and grown for 7 days in control (+Fe+P) media, and then transferred to

691 +Fe+P, Fe+P, or -Fe-P. Shoot tissues were collected at 76h after the transfer, and  
692 then used for total RNA extraction as described in<sup>33</sup>. Each experiment was conducted  
693 with 16 plants and 4-6 plants were pooled for RNA extraction, resulting in 3-4  
694 biological replicates. Two  $\mu$ g of the total RNA was used for reverse transcription  
695 (Promega) to synthesize cDNA using oligo(dT) primer (Promega). Real-time  
696 quantitative reverse-transcription PCR (qRT-PCR) was performed as described in<sup>33</sup>  
697 using 384-well plates with a LightCycler 480 Real-Time PCR System (Roche  
698 diagnostics). The *Ubiquitin 10* mRNA (*UBQ10*: At4g05320) was used as control to  
699 calculate the relative mRNA level of each gene. The primers used in this study are  
700 listed in Table S2.

701

### 702 *Genome wide association studies (GWAS)*

703 Gene expression data of the 32 genes that were specifically downregulated by -Fe+P  
704 but not by -Fe-P relative to +Fe+P were downloaded from leaf expression data of 727  
705 Arabidopsis accessions<sup>15</sup>. Normalized RNA-seq read counts of these genes were  
706 used to perform Principal Component Analysis, and contributions of the accessions  
707 to PC1 that explained 89.5% of the expression variance of the 32 genes were used to  
708 run genome-wide association (GWA) analysis. GWA mapping was performed using  
709 1001 genomes SNP data<sup>34</sup> as implemented in the web application GWAPP<sup>35</sup>.  
710 Bonferroni correction ( $\alpha = 0.05$ ) and false-discovery rate (FDR) at 5%<sup>36</sup> were  
711 implemented to account for multiple hypothesis tests.

### 712 *Statistical analysis*

713 Box plots were generated using a web based application "BoxPlotR"<sup>37</sup>. Statistical  
714 analyses of the data were performed using analysis of variance (ANOVA). One-way  
715 ANOVA with a Duncan post-hoc test, and two-way analysis of variance (ANOVA) and  
716 Tukey's honest significant difference (HSD) test were used to compare mean values.  
717 For all the statistical analyses, the difference was considered statistically significant  
718 when the test yielded a p-value < 0.05.

### 719 **Acknowledgements**

720 The authors thank the members of Rhee lab; Benoit Lacombe and HONUDE team  
721 (INRAe) for their comments on the manuscript and helpful discussions. We thank the  
722 ICP-MS/TIMS Facility within Stanford University for assistance with the ICP-MS  
723 measurements, and the Stanford Functional Genomics Facility for assistance with  
724 RNA sequencing (Stanford, CA). The GWAS analysis was made possible by data  
725 generated by Kawakatsu et al. <sup>15</sup>.

726

### 727 **Funding**

728 This work was funded in part by the “Institut National de la Recherche Agronomique  
729 – Montpellier – France” INRA, the AgreeenSkills Plus, and Michigan State University  
730 (USA) to H.R. as well as by the Carnegie Institution for Science, Brigitte Berthelemot,  
731 National Science Foundation (IOS-1546838, IOS-1026003), and the U.S. Department  
732 of Energy, Office of Science, Office of Biological and Environmental Research,  
733 Genomic Science Program grant nos. DE-SC0018277, DE-SC0008769, and DE-  
734 SC0020366 to S.Y.R. The funders had no role in study design, data collection and  
735 analysis, decision to publish, or preparation of the manuscript.

736

### 737 **Competing interests**

738 No competing interests declared.

739

### 740 **Contributions**

741 S.Y.R. and H.R. conceived the project. Experiments were designed by S.Y.R., H.R.,  
742 H.N., and Z.S. and mainly carried out by H.N. S.C. performed and analyzed  
743 experiments related to photosystem II activity. bZIP58-GFP localization, ascorbic acid  
744 quantification and hydrogen peroxide assays were conducted by H.C. and N.B. RNA-  
745 seq data were generated and analyzed by Y.D. Gene Ontology analysis was  
746 performed K.Z. Z.S. performed the genome-wide association mapping. H.R.  
747 performed the qRT-PCR analyses, generated plasmid constructs, the homozygote  
748 mutants, and the complemented mutant lines. S.Y.R., H.R. and Z.S. wrote the paper  
749 with input from all authors.

750

### 751 **Data availability**

752 Data supporting the findings of this work are available within the paper and its  
753 Supplementary Information and Source Data files. The datasets and plant materials  
754 generated and analyzed during the current study are available from the  
755 corresponding author H.R. upon request. Transcriptome data were deposited in  
756 NCBI's Gene Expression Omnibus (GEO) under a project number GSE163190.

**Figure 1****A**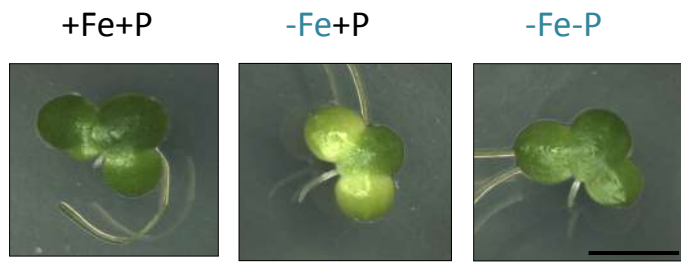**B**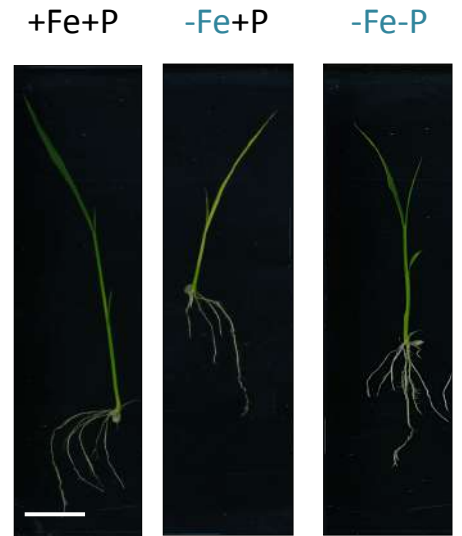**C**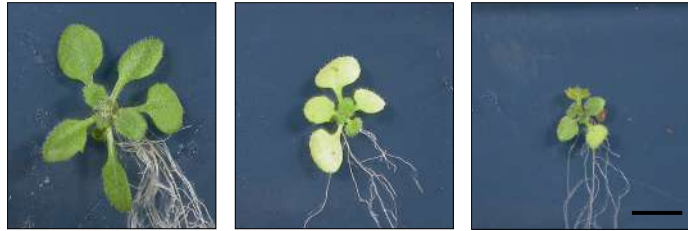**D**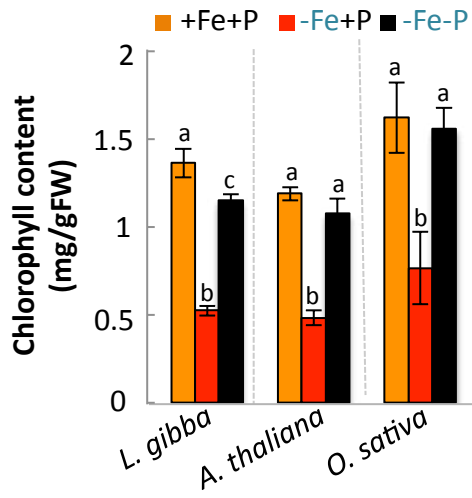**E**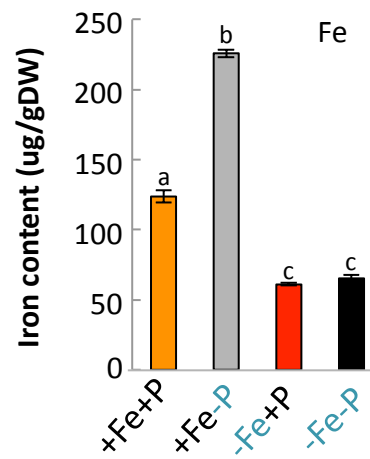**F**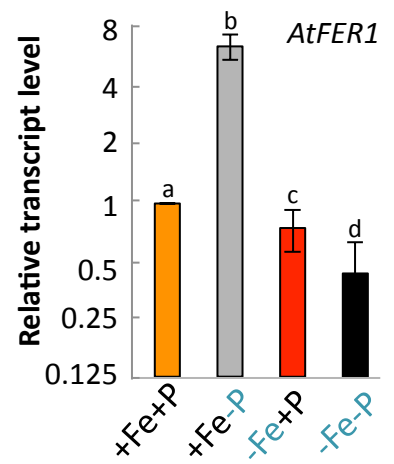



**Figure 2**

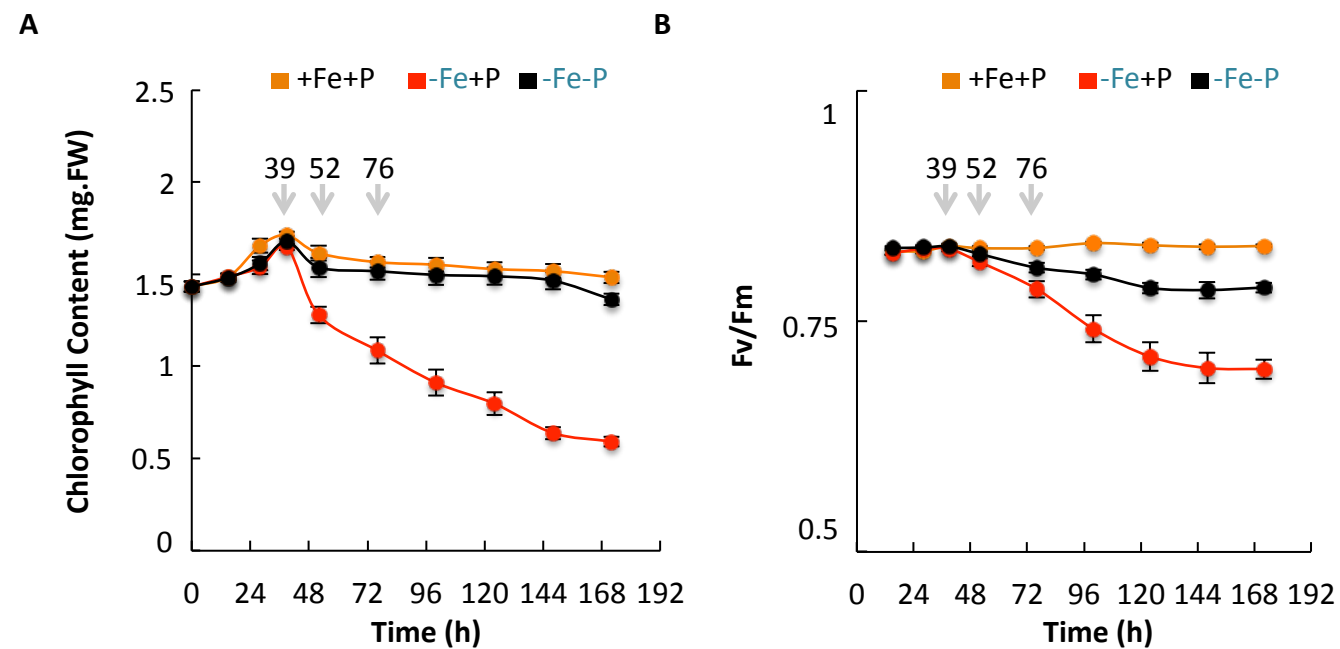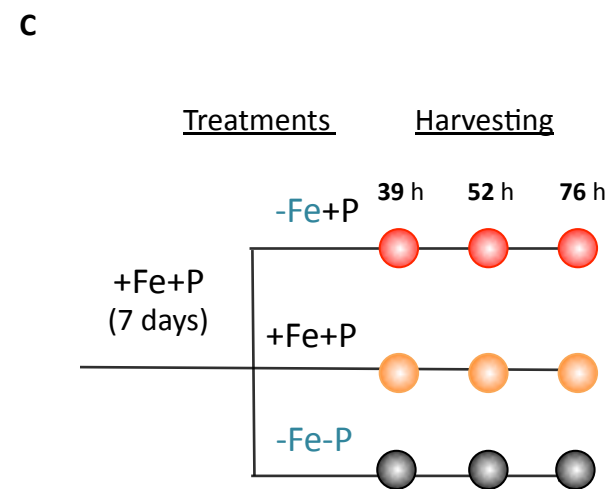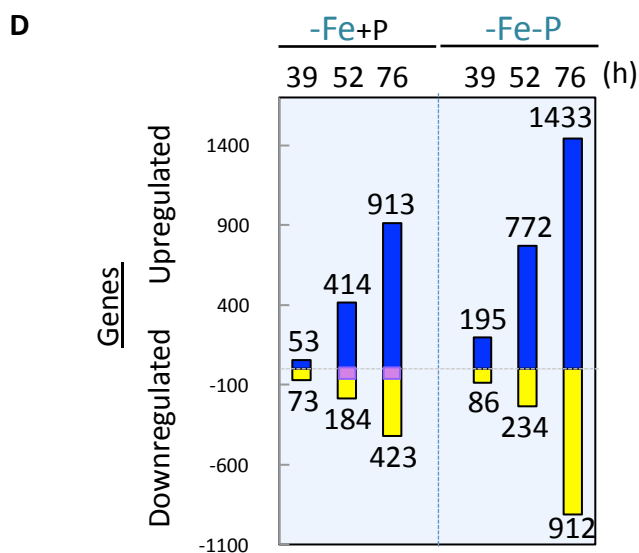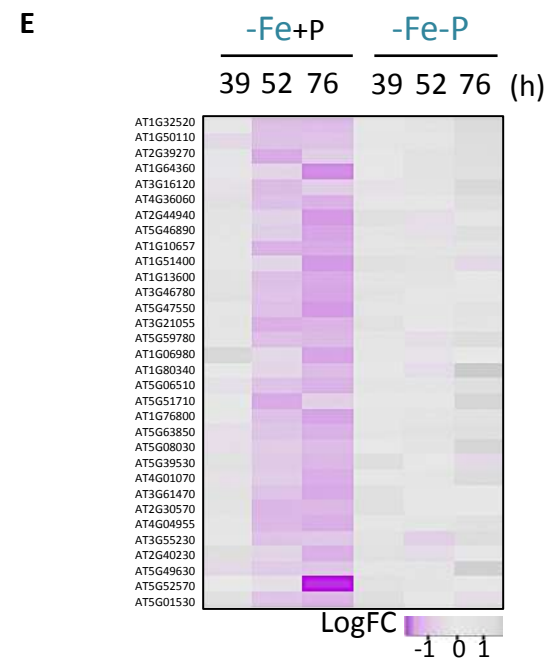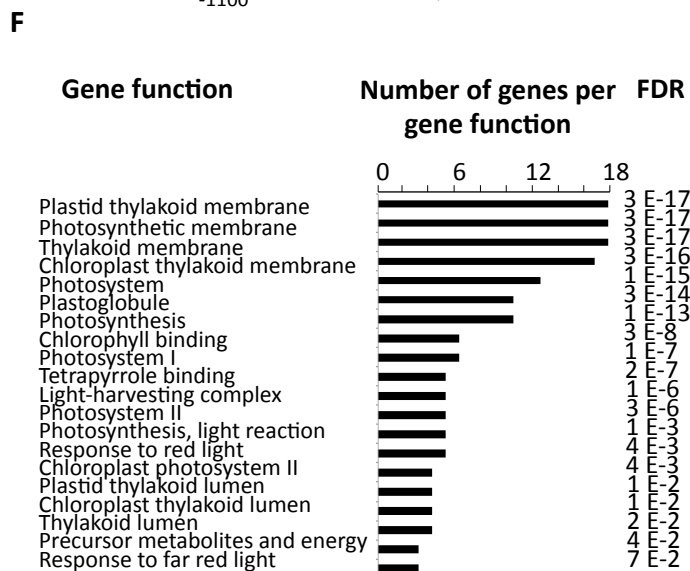

**Figure 3**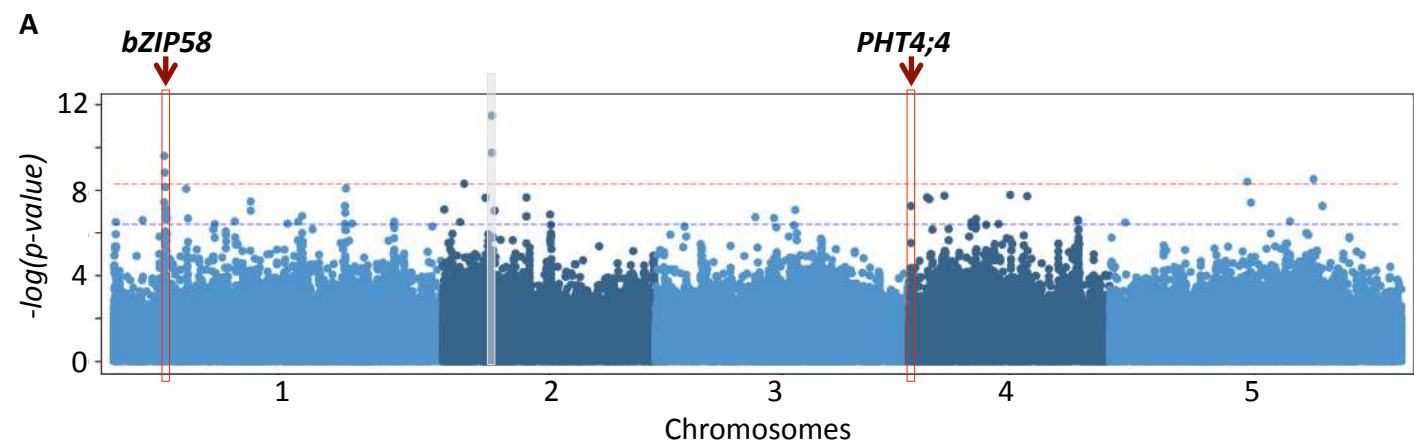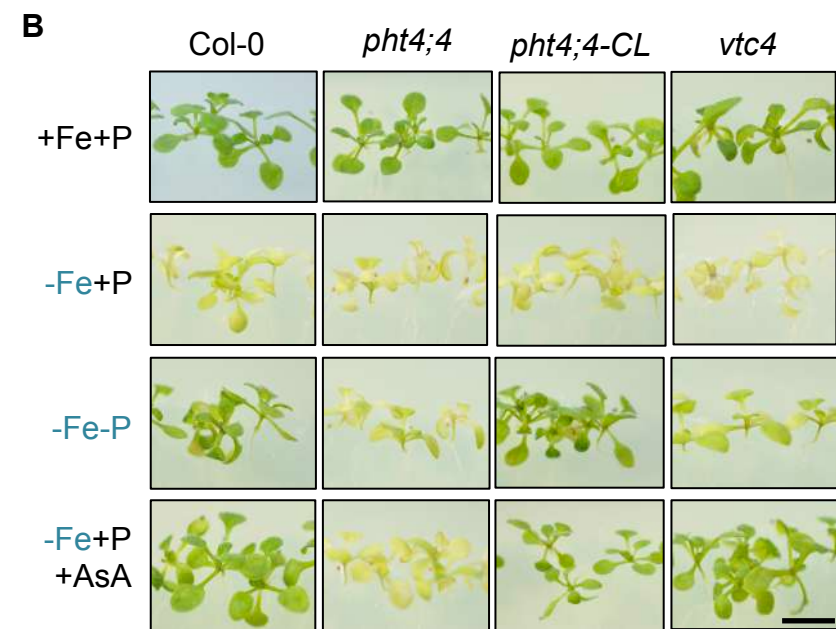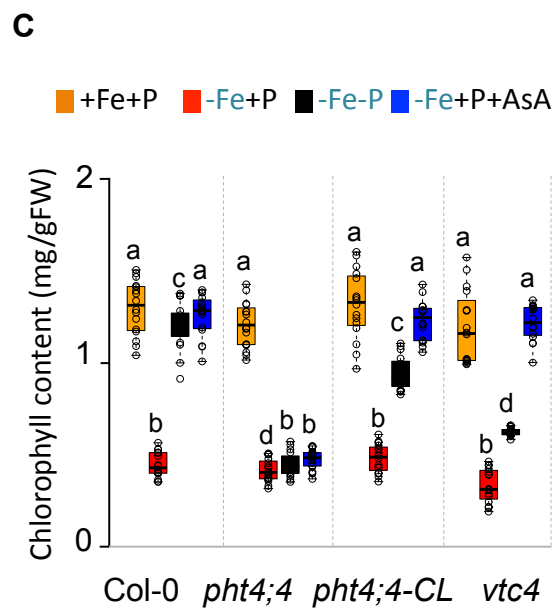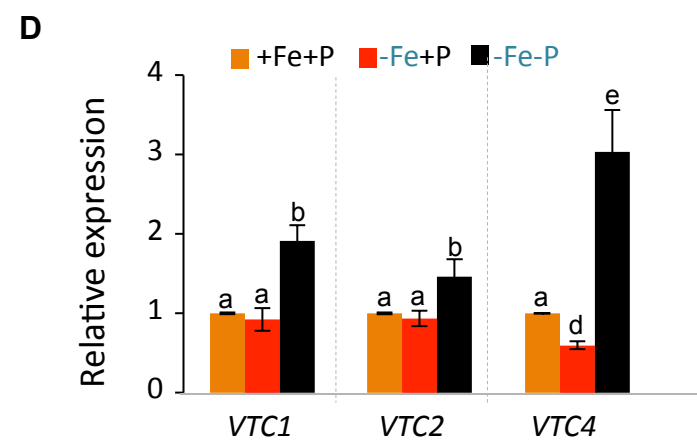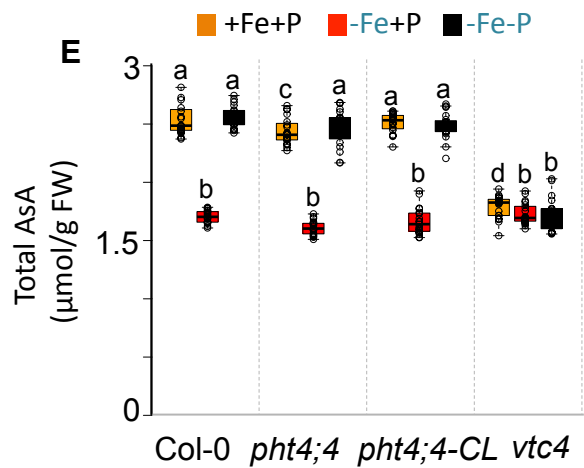

**Figure 4**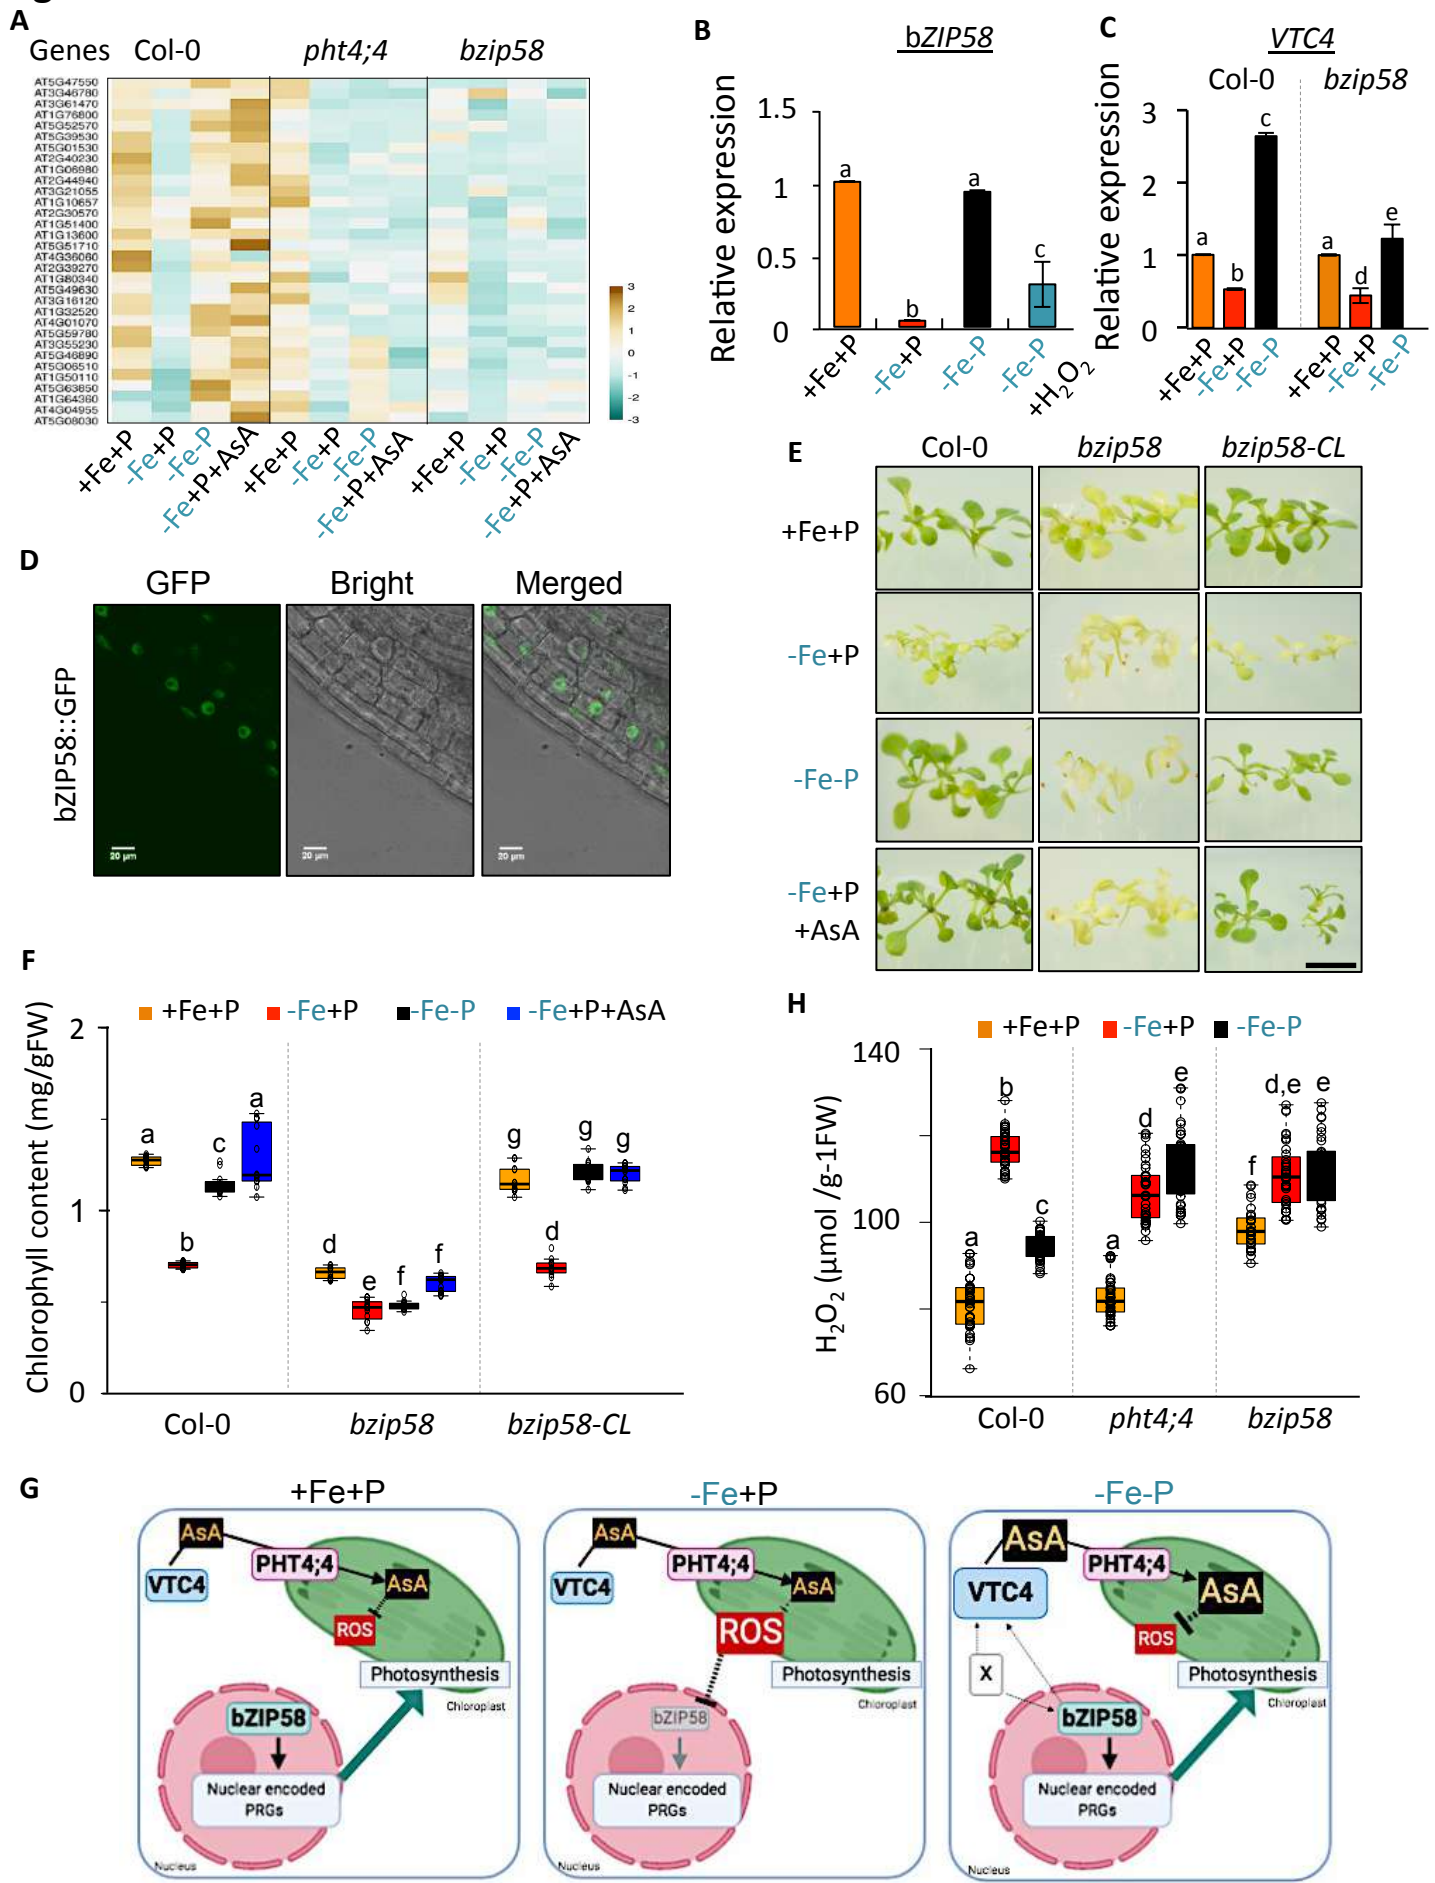

# Supplemental Figure 1

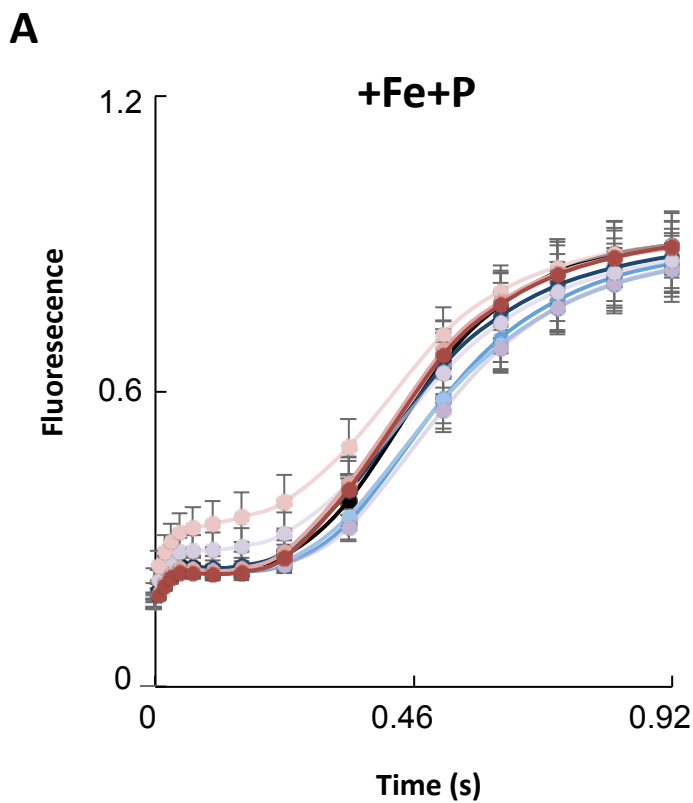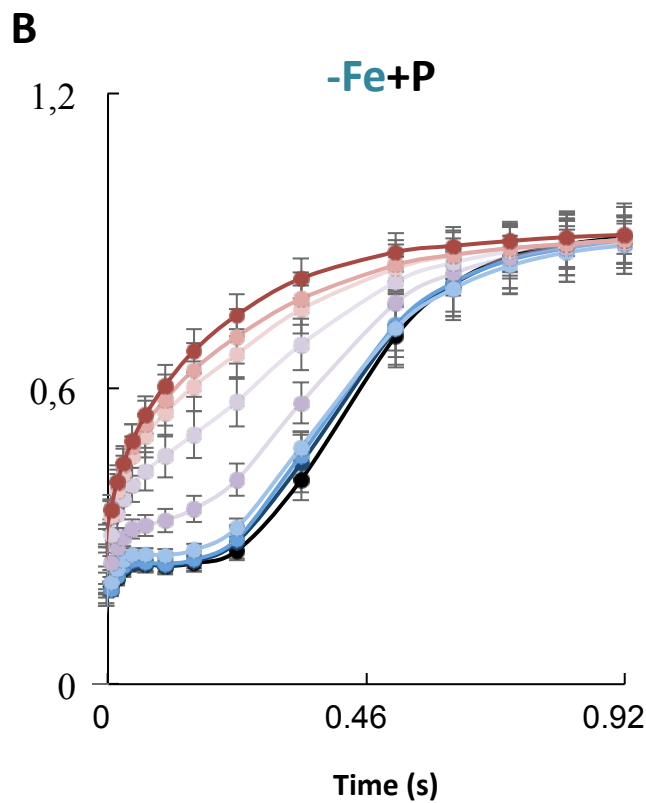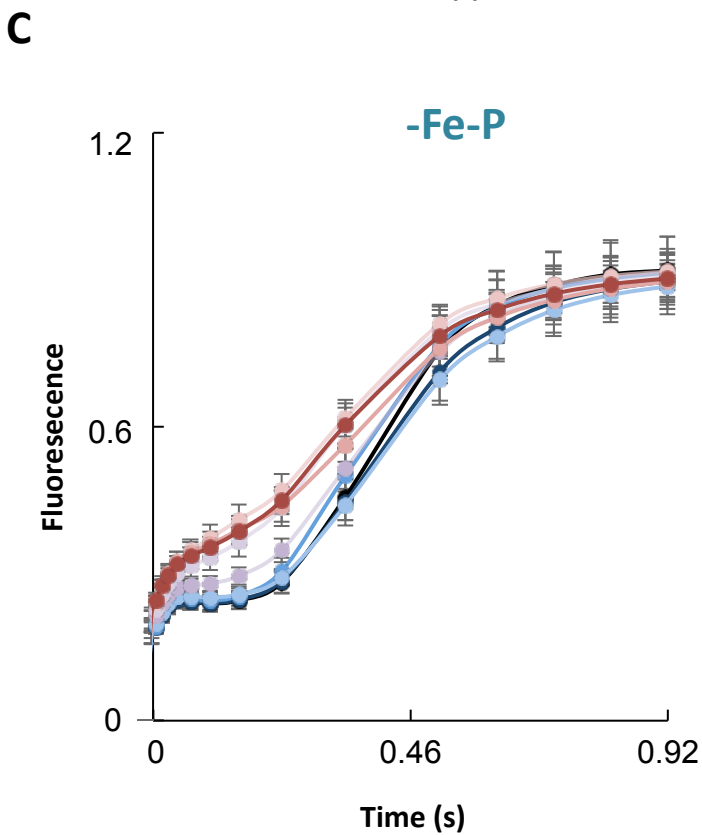

# Supplemental Figure 2

● NS ●  $\text{Log}_2$  FC ● p-value ● p-value and  $\text{Log}_2$  FC

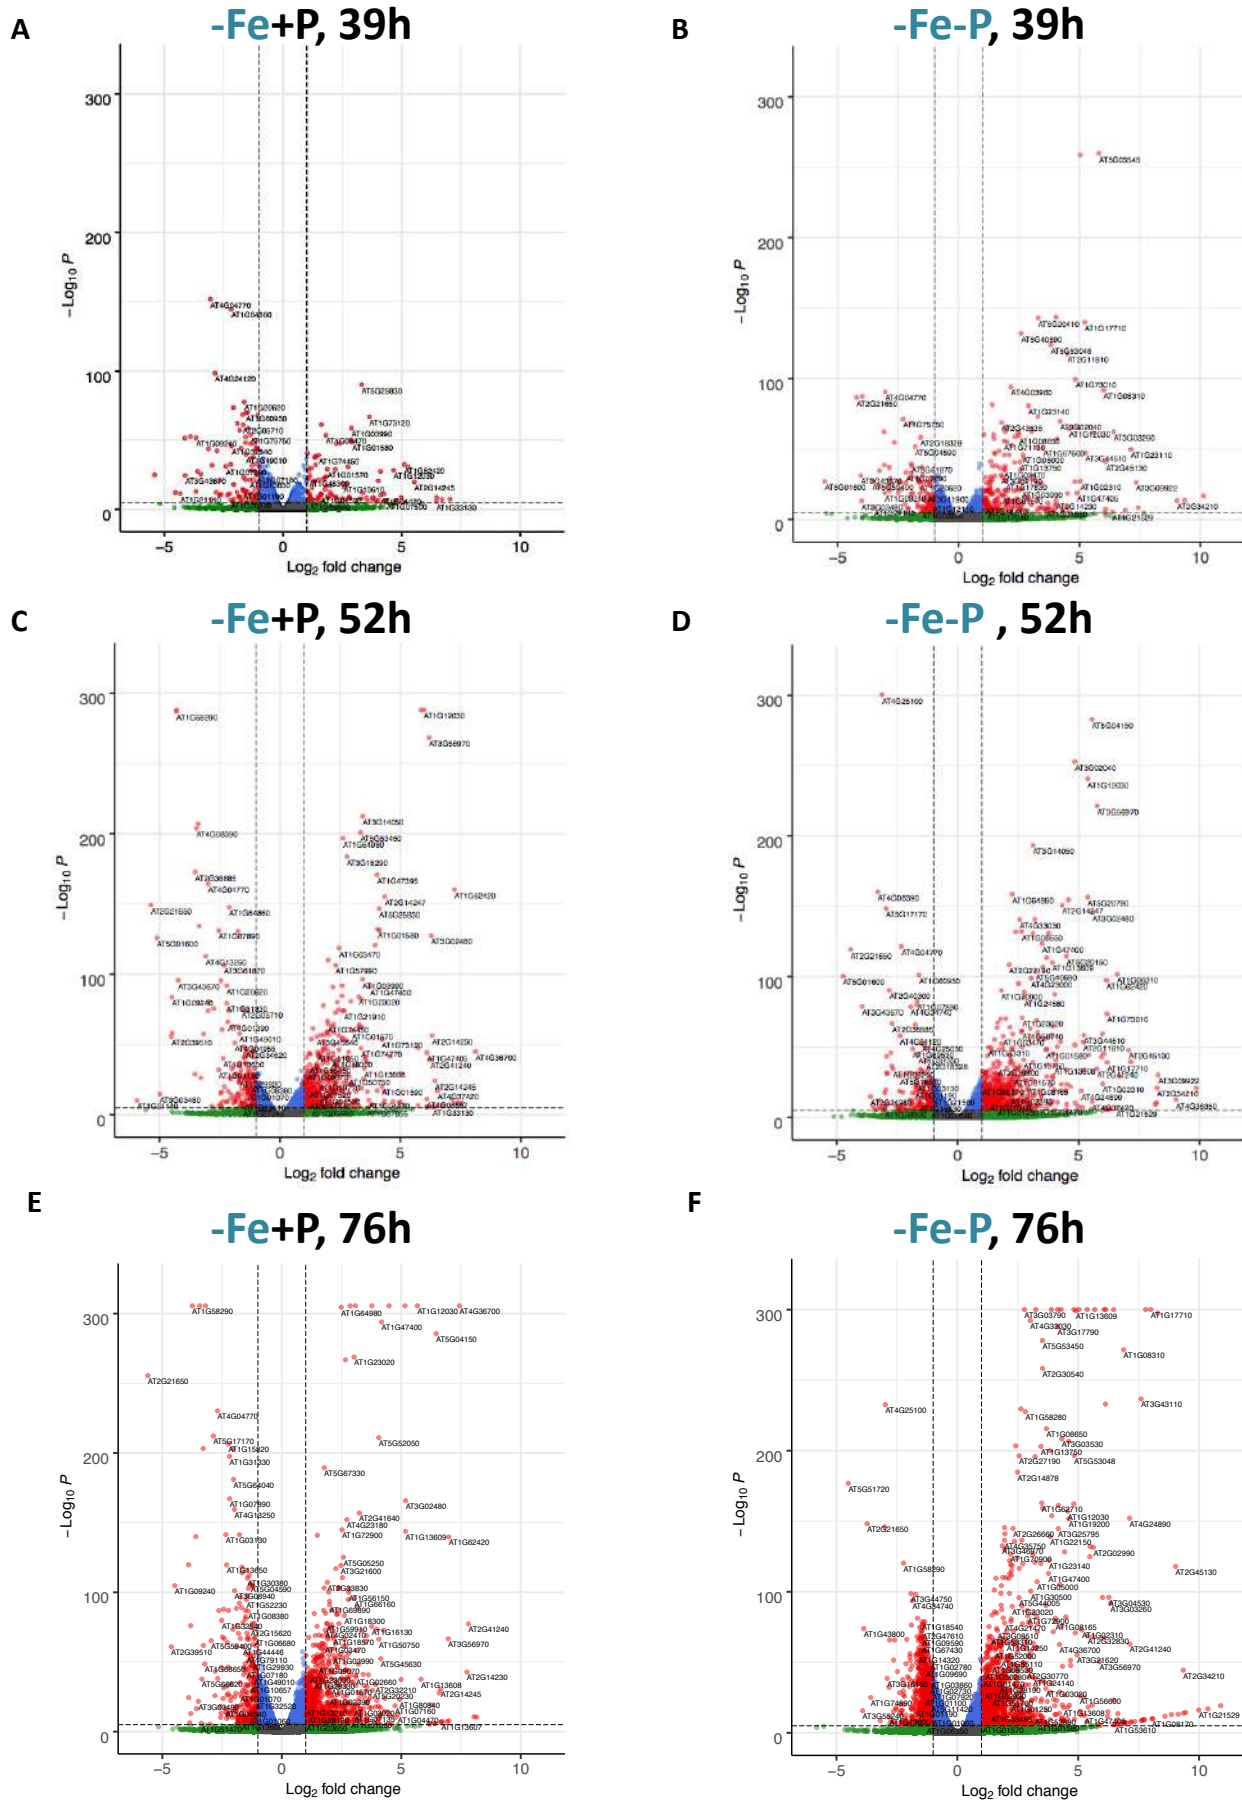

# Supplemental Figure 3

A

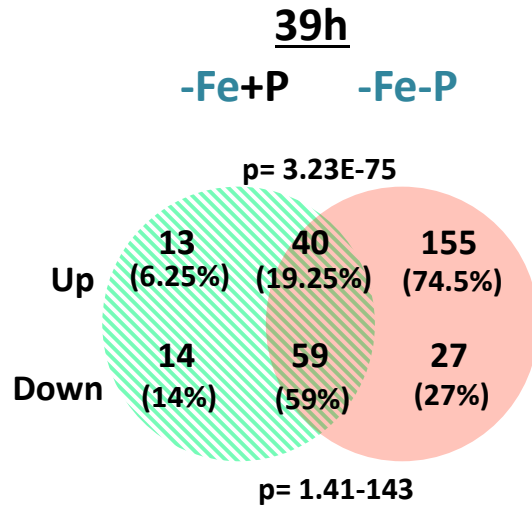

B

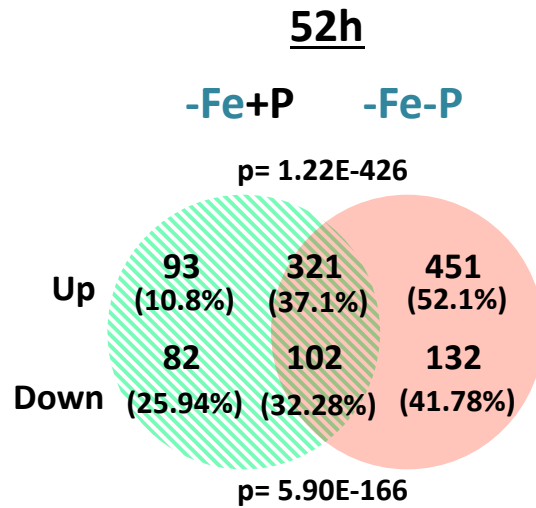

C

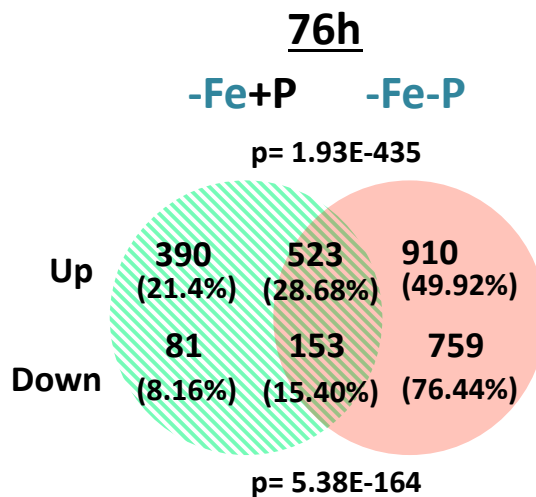

# Supplemental Figure 4

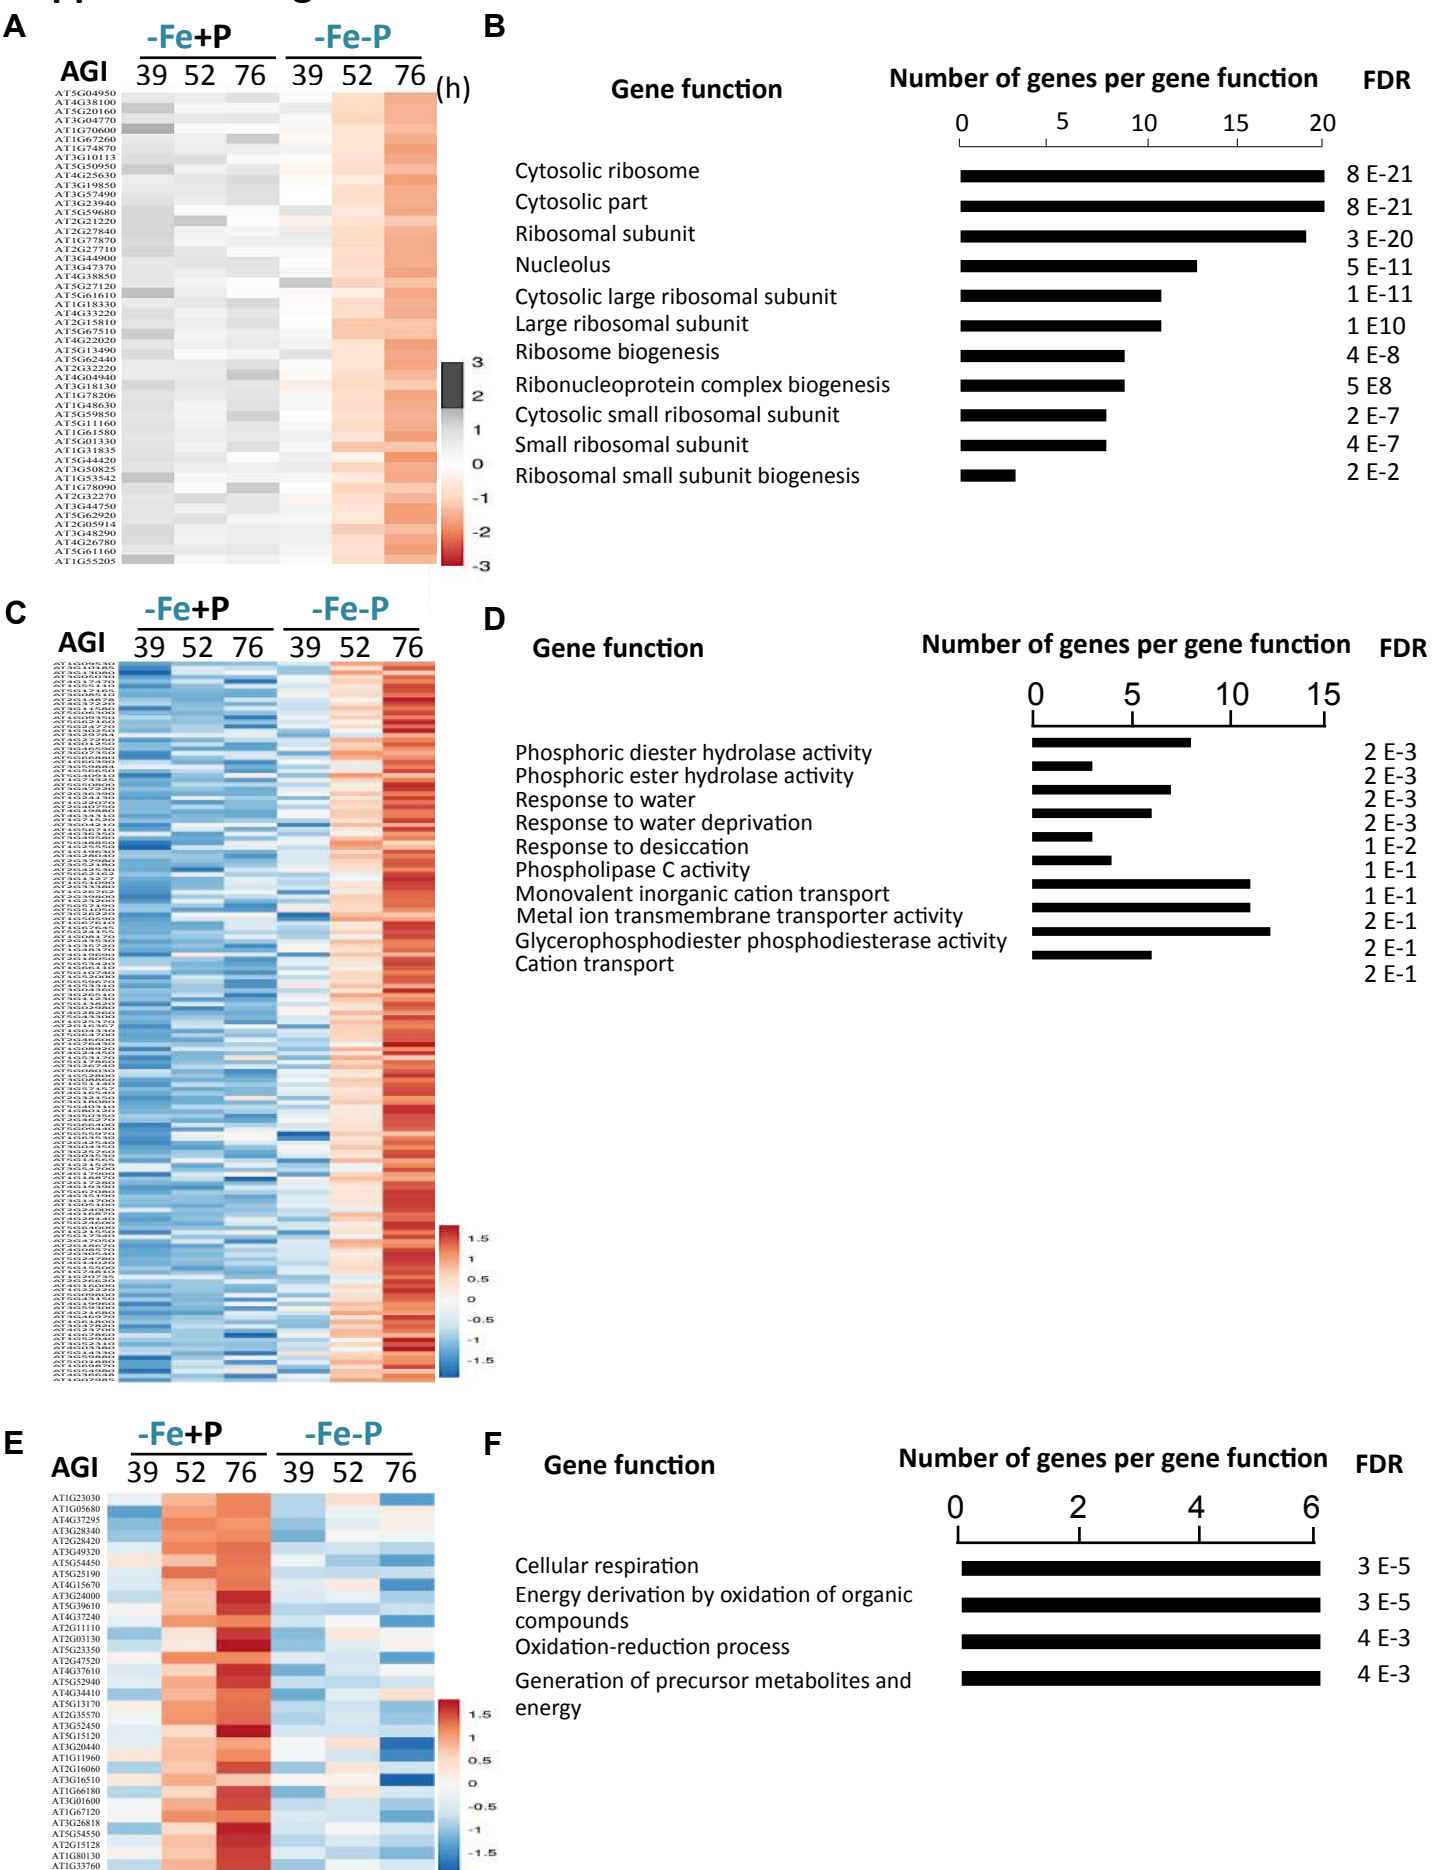

# Supplemental Figure 5

**A**

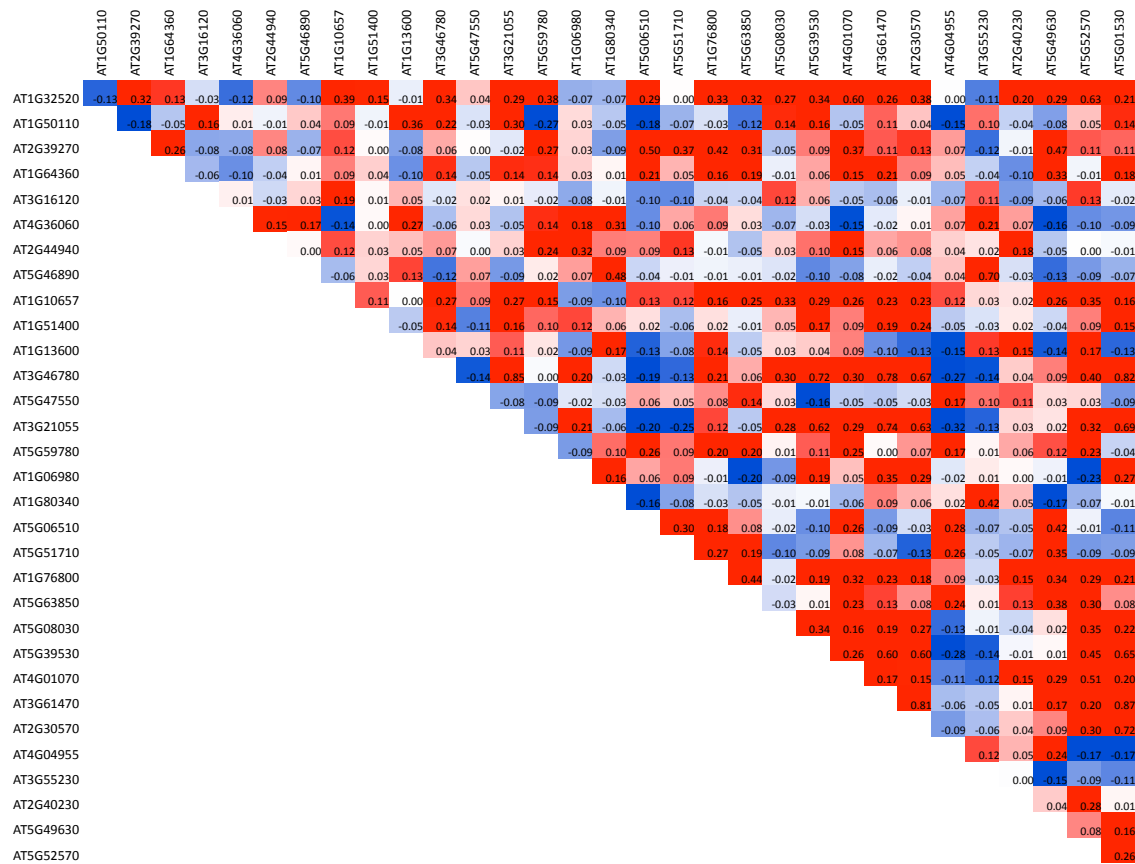

**B**

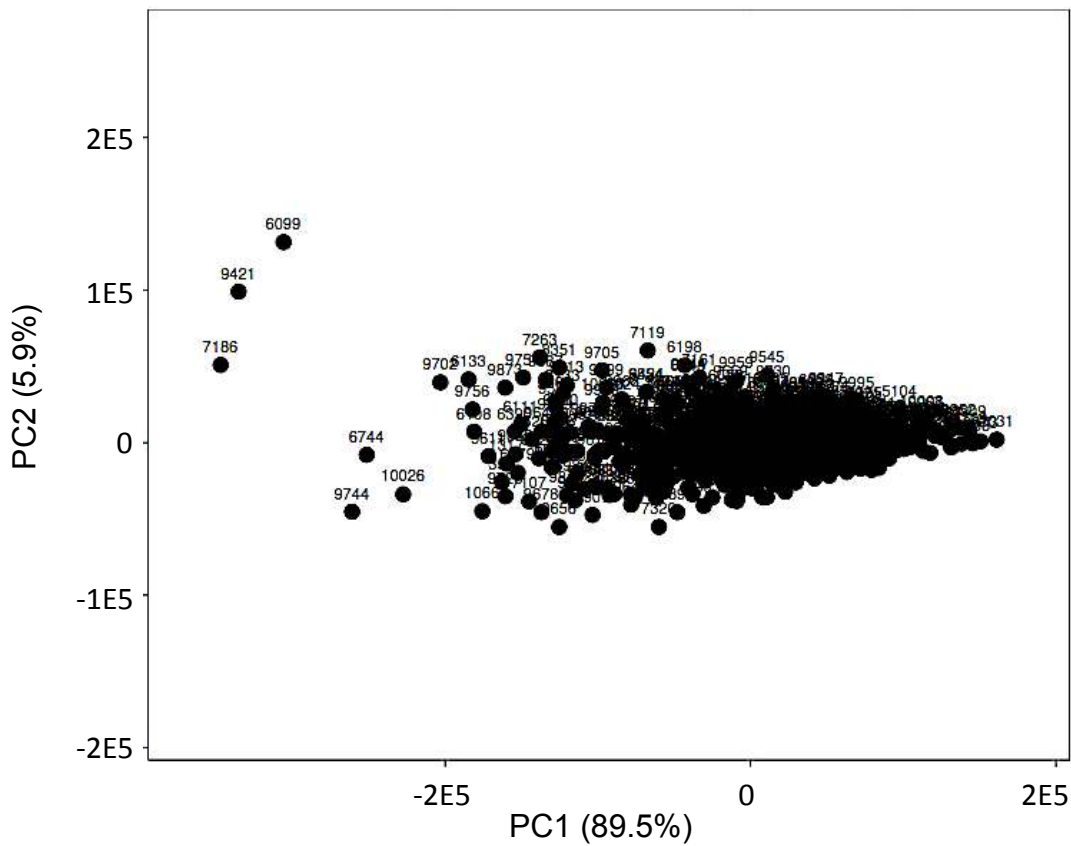



# Supplemental Figure 6

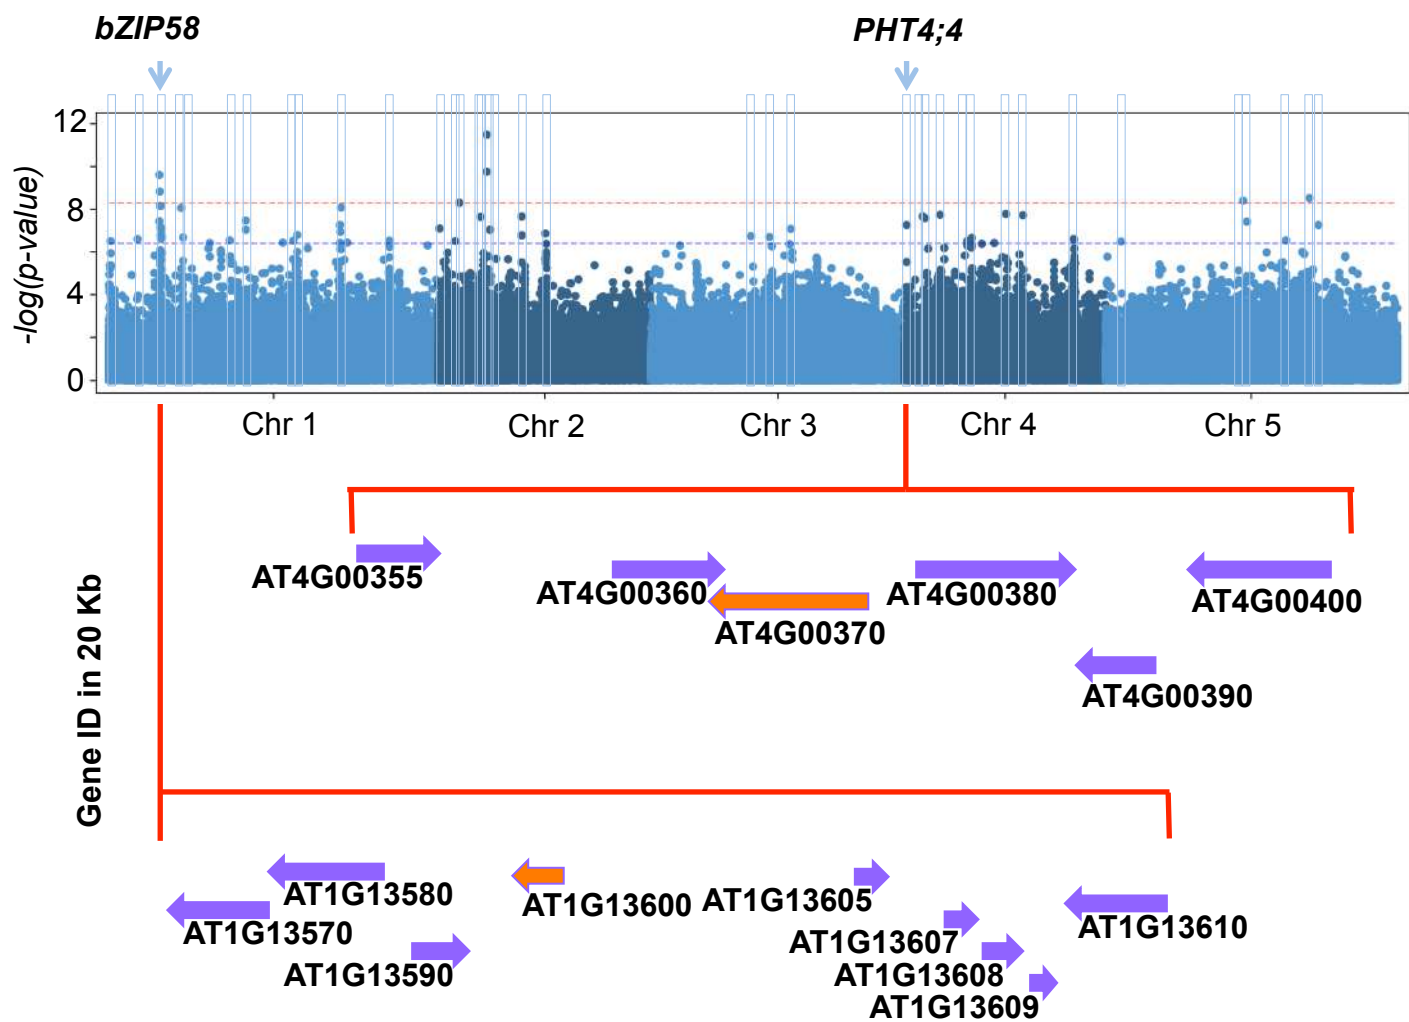

Supplemental Figure 7

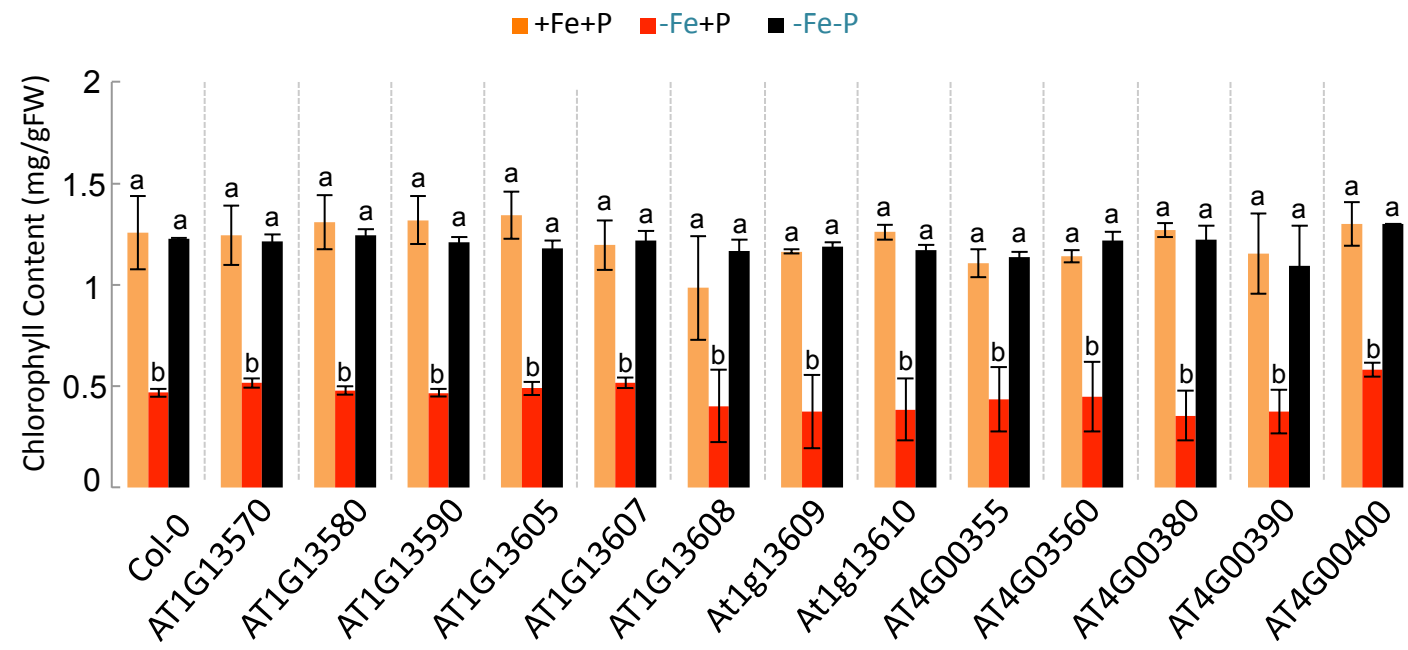

Source: https://biorxiv.org/content/10.1101/2021.02.11.430802v1.full.pdf
